# Supplementary material for: Incidence and relative risk for developing cancers in women with gestational diabetes mellitus: a nationwide cohort study in Taiwan
Source: PubMed Central journal article supplement — BMJ Open. 2019 Feb 21;9(2):e024583. doi: 10.1136/bmjopen-2018-024583 (PMC6398720; doi:10.1136/bmjopen-2018-024583), 2019-02-21
Supplement: bmjopen-2018-024583.draft_revisions.pdf [file bmjopen-2018-024583.draft_revisions.pdf]

# BMJ Open

BMJ Open is committed to open peer review. As part of this commitment we make the peer review history of every article we publish publicly available.

When an article is published we post the peer reviewers' comments and the authors' responses online. We also post the versions of the paper that were used during peer review. These are the versions that the peer review comments apply to.

The versions of the paper that follow are the versions that were submitted during the peer review process. They are not the versions of record or the final published versions. They should not be cited or distributed as the published version of this manuscript.

BMJ Open is an open access journal and the full, final, typeset and author-corrected version of record of the manuscript is available on our site with no access controls, subscription charges or pay-per-view fees (<http://bmjopen.bmj.com>).

If you have any questions on BMJ Open's open peer review process please email [editorial.bmjopen@bmj.com](mailto:editorial.bmjopen@bmj.com)

# BMJ Open

## Incidence and relative risk for developing cancers in women with gestational diabetes mellitus: a nationwide cohort study in Taiwan

|                               |                                                                                                                                                                                                                                                                                                                                                                                                                        |
|-------------------------------|------------------------------------------------------------------------------------------------------------------------------------------------------------------------------------------------------------------------------------------------------------------------------------------------------------------------------------------------------------------------------------------------------------------------|
| Journal:                      | <i>BMJ Open</i>                                                                                                                                                                                                                                                                                                                                                                                                        |
| Manuscript ID                 | bmjopen-2018-024583                                                                                                                                                                                                                                                                                                                                                                                                    |
| Article Type:                 | Research                                                                                                                                                                                                                                                                                                                                                                                                               |
| Date Submitted by the Author: | 03-Jun-2018                                                                                                                                                                                                                                                                                                                                                                                                            |
| Complete List of Authors:     | Peng, Yun-Shing; Chang Gung Memorial Hospital, Chiayi, Division of Endocrinology and Metabolism; Chang Gung University<br>Lin, Jr-Rung; Chang Gung University, Clinical Informatics and Medical Statistics Research Center<br>Cheng, Bi-Hua<br>Ho, Cheng<br>Lin, Yung-Hsiang<br>Shen, Chien-Hen<br>Tsai, Ming-Hung; Chang Gung Memorial Hospital Linkou Branch, Department of Internal Medicine; Chang Gung University |
| Keywords:                     | Diabetes in pregnancy < DIABETES & ENDOCRINOLOGY, cancer, population-based cohort study                                                                                                                                                                                                                                                                                                                                |
|                               |                                                                                                                                                                                                                                                                                                                                                                                                                        |

SCHOLARONE™  
Manuscripts

**Article title**

Incidence and relative risk for developing cancers in women with gestational diabetes mellitus: a nationwide cohort study in Taiwan

**Running title:**

Increased risk of cancer with previous gestational diabetes

**Authors:**

Yun-Shing Peng,<sup>1,2</sup> Jr Rung Lin<sup>2,3</sup>, Bi-Hua Cheng<sup>4</sup>, Cheng Ho<sup>1</sup>, Yung-Hsiang Lin<sup>1</sup>, Chien-Hen Shen<sup>5</sup>, Ming-Hung Tsai<sup>2,6</sup>

<sup>1</sup>Division of Endocrinology and Metabolism, Chang Gung Memorial Hospital, Chia-Yi, Taiwan.

<sup>2</sup>Chang Gung University, College of Medicine, Tao-Yuan, Taiwan

<sup>3</sup>Clinical Informatics and Medical Statistics Research Center and Graduate Institute of Clinical Medicine, Chang Gung University, Taoyuan, Taiwan

<sup>4</sup>Department of Obstetrics and Gynecology, Chang Gung Memorial Hospital, Chiayi, Taiwan.

<sup>5</sup>Department of internal medicine, Chang Gung Memorial Hospital, Chia-Yi, Taiwan.

<sup>6</sup>Department of internal medicine, Chang Gung Memorial Hospital, Lin-Kuo medical center, Taoyoun, Taiwan.

**Corresponding author:**

Ming-Hung Tsai, MD

Department of internal medicine

Chang Gung Memorial Hospital

Chang Gung University

No.5, Fu-Hsing Street, Guei-Shan District, Taoyuan, Taiwan

Tel: +886-3-3281200 ext. 8108

Fax: +886-3-3288662

E-mail: mhtsai@cgmh.org.tw

**Word count**

2948

**Number of tables**

3

**Number of Figures**

2

**Abbreviations**

GDM, gestational diabetes; T2DM, type 2 diabetes; NHIRD, National Health

1  
2  
3  
4  
5  
6  
7  
8  
9  
10  
11  
12  
13  
14  
15  
16  
17  
18  
19  
20  
21  
22  
23  
24  
25  
26  
27  
28  
29  
30  
31  
32  
33  
34  
35  
36  
37  
38  
39  
40  
41  
42  
43  
44  
45  
46  
47  
48  
49  
50  
51  
52  
53  
54  
55  
56  
57  
58  
59  
60

Insurance Research Database; ICD-9-CM, International Classification of Disease, 9th  
Revision, Clinical Modification; OPD, outpatient department; AHR, adjusted hazard  
ratio.

**Conflict of interest**

The authors declare no conflict of interest.

For peer review only

## ABSTRACT

### Objectives:

To evaluate the risk of developing cancers, particularly site-specific cancers, in women with gestational diabetes mellitus (GDM) in Taiwan.

### Setting:

The National Health Insurance Research Database (NHIRD) of Taiwan.

### Participants

This study was conducted using the nationwide data from 2000 to 2013. In total, 1,466,596 pregnant women with admission for delivery were identified. Subjects with GDM consisted of 47,373 women, while the control group consisted of 943,199 women without GDM. The participants were followed from the delivery date to the diagnosis of cancer, death, the last medical claim or the end of follow-up (December 31 2013), whichever came first.

### Primary outcome measures:

Patients with a new diagnosis of cancer (ICD-9-CM codes 140–208) recorded in NHRID were identified. The risk of 11 major cancer types was assessed, including cancers of head and neck, digestive organs, lung and bronchus, bone and connective tissue, skin, breast, genital organs, urinary system, brain, thyroid and hematological system.

**Results:**

The rates of developing cancers were significantly higher in women with GDM compared to non-GDM group (2.24% vs. 1.96%;  $p < 0.001$ ). After adjusting for maternal age at delivery and comorbidities, women with GDM had increased risk of cancers, including cancers of nasopharynx (adjusted hazard ratio (AHR), 1.739; 95 % CI, 1.400 to 2.161;  $p < 0.0001$ ), kidney (AHR, 2.169; 95 % CI, 1.428 to 3.293;  $p = 0.0003$ ), lung and bronchus (AHR, 1.372; 95 % CI, 1.044 to 1.803;  $p = 0.0231$ ), breast (AHR, 1.234; 95 % CI, 1.093 to 1.393;  $p = 0.007$ ), and thyroid gland (AHR, 1.389; 95 % CI, 1.121 to 1.721;  $p = 0.0026$ ).

**Conclusion:** Women with GDM have a higher risk of developing cancers. Cancer screening is warranted in women with GDM. Future research should be aimed to establish whether this association is causal.

**Keywords :** Gestational diabetes, Cancer, National health insurance research database

### Strengths and limitations of this study

- Our study represents the first one to document that women with GDM have a higher risk of developing cancers of nasopharynx, lung and bronchus, and kidney.
- This nationwide population-based cohort study included more than one million women, making selection bias minimal. Furthermore, the use of big data from Taiwan NHIRD also decreased the risk of recall bias which is inherent to self-reporting. Thus, our findings are potentially generalizable.
- The data from NHIRD lack information on other factors that may be associated with GDM and cancer, such as smoking, alcohol consumption, obesity, dietary style, environmental exposure, genetic parameters, and family history of cancers.
- The relatively short follow-up period ( $6.84\pm 3.05$  years) in our study may not have allowed some slow-growing cancers to be detected.



## INTRODUCTION

Pregnancy is normally accompanied by insulin resistance, which is facilitated by placental production of diabetogenic hormones. Gestational diabetes mellitus (GDM) develops in pregnant women whose pancreatic islet function is inadequate to overcome the insulin resistance that accompanies pregnancy (1). GDM is associated with adverse outcomes of pregnancy, for example, preeclampsia, macrosomia, and cesarean delivery (1). The prevalence of GDM varies worldwide and among racial and ethnic groups (2), and is generally in parallel with the prevalence of type 2 diabetes (T2DM). Indeed, it has been shown that women diagnosed with GDM are at lifetime risk of developing T2DM subsequently (3). Lately, the prevalence of GDM has been on the rise (4). The reasons for this phenomenon may be an increase in maternal age, obesity issues and a decrease in daily physical activity.

Accumulating lines of evidence have demonstrated an association between T2DM and certain types of cancers. Although the exact causes for this phenomenon are not yet fully understood, chronic hyperinsulinemia which is prompted by insulin resistance has been proposed to be the major channel through which T2DM can trigger tumor growth. Some studies, although not all, suggested that T2DM may contribute to an increased mortality (5). Interestingly, the increase in cancer risk has been found not only in T2DM but also in pre-diabetes (6). GDM is characterized by

1  
2  
3  
4 hyperglycemia, insulin resistance, hyperinsulinemia and increased levels of  
5  
6 Insulin-like growth factor 1 (IGF-1), which can potentially lead to uncontrolled  
7  
8 growth of cells and cancer (1, 7). Since GDM has the same characteristics as T2DM  
9  
10 and is a predictor for subsequent overt T2DM, it is plausible that GDM may represent  
11  
12 a risk factor for the future cancers. Indeed, several studies have been conducted to  
13  
14 address whether GDM increases risk of cancer, but yielded mixed results probably  
15  
16 because of methodological limitations such as self-reported GDM information,  
17  
18 relatively small population and insufficient statistical power resulting from rare  
19  
20 occurrence of cancers among young women (7-12). Most previous studies focused on  
21  
22 the association between GDM and breast cancer. Only a few have investigated the  
23  
24 relationship between GDM and other types of cancers. Moreover, few studies on the  
25  
26 association between cancer and GDM have been carried out in Asia-Pacific region  
27  
28 where certain types of cancer are particularly prevalent. Therefore, it is unknown  
29  
30 whether currently available data can be generalized to different ethnic groups.  
31  
32  
33  
34  
35  
36  
37  
38  
39  
40  
41  
42

43 The aim of this study was to determine the risk of developing cancers particularly  
44  
45 site-specific cancers in women with prior GDM using the National Health Insurance  
46  
47 Research Database (NHIRD), which was created by National Health Research  
48  
49 Institutes (NHRI) for academic research (13).  
50  
51  
52  
53  
54  
55  
56  
57  
58  
59  
60

## MATERIALS AND METHODS

### *Ethics statement*

This study was granted a waiver for the requirement for informed consents by the Institutional Review Board of Chang Gung memorial Hospital (IRB: 103-2572B) because all data in the NHIRD were anonymized and de-identified before release.

### *Source of data*

Data in NHIRD were used. NHIRD contains the registration files and original claim data for reimbursements from the national health insurance (NHI) program of Taiwan; This NHI program was implemented in 1995; and covers 99.5% of the 23 million residents in Taiwan. NHI program offers a comprehensive, unified, and universal health insurance program to all citizens. The coverage includes outpatient service, inpatient care, dental care, childbirth, physical therapy, preventive health care, home care, and rehabilitation for chronic mental illnesses (14). The database contains all dates of inpatient and outpatient services, diagnosis, prescriptions, examinations, operations, and expenditures, and is updated biannually.

### *Study groups:*

This study used data published by the NHRI in Taiwan and covered the years from 2000 to 2013. The diagnostic coding of the NHI in Taiwan was performed according to the International Classification of Disease, 9th Revision, Clinical

1  
2  
3  
4 Modification (ICD-9-CM) diagnostic criteria.  
5

6  
7 ***Inclusion and exclusion criteria:***  
8

9 A total of 1,466,596 pregnant women with admission for delivery were found in  
10  
11 the NHIRD between Jan 1, 2002 and Dec 31, 2012. Among these women, we  
12  
13 identified 47,373 women who had been diagnosed with gestational diabetes  
14  
15 (ICD-9-CM code 648, 250), and had at least 2 consensus diagnoses at prenatal  
16  
17 outpatient visits or at least one diagnosis at inpatient admissions during the prenatal  
18  
19 period to ensure the validity of diagnosis. (Fig.1). The remaining 943,199 women  
20  
21 without GDM, diabetes or malignancy were used as controls. The incidence of GDM  
22  
23 was 4.78 in 100 deliveries during the 11-year span (Table 1).  
24  
25  
26  
27  
28  
29  
30

31 Patients with missing data (n=422,568), history of malignancy (ICD-9-CM codes  
32  
33 140 to 208) (n=9,809), or diabetes (ICD-9-CM codes 250) (n=37,026) two years  
34  
35 before pregnancy were excluded. The date of delivery was set as the index date. To  
36  
37 avoid inclusion of patients with cancers that arose during or before pregnancy, GDM  
38  
39 and control participants were followed for 180 days after delivery until malignancy  
40  
41 diagnosis, death, the last medical claim or the end of study follow-up (December 31  
42  
43 2013), whichever came first. We excluded the women with a cancer diagnosis during  
44  
45 pregnancy or within 180 days postpartum. (n=778). 5827 patients were also excluded  
46  
47 due to loss of follow-up within 180 days after delivery.  
48  
49  
50  
51  
52  
53  
54  
55  
56  
57  
58  
59  
60

### ***Primary outcome***

The primary outcome was defined as a new diagnosis of any cancer (ICD-9-CM codes 140–208) recorded in NHRID between January 1, 2002 and December 31, 2013.

### ***Sub-classification of Cancers***

We classified cancers into the 11 groups as previously described (12), on basis of the ICD-9-CM (Table 3): cancers of head and neck, digestive organs, lung and bronchus, bone and connective tissue, skin, breast, genital organs, urinary system, brain, thyroid gland and hematological system. Some of these cancers were further sub-classified as follows: The digestive subgroup included cancers of the esophagus, stomach, colon and rectum, liver, biliary system, and pancreas. The genital subgroup included cancers of the cervix uteri, ovary, and uterus. The urinary subgroup included cancers of urinary bladder and kidney. The head and neck subgroup included cancers of oral cavity and pharynx, nasopharynx, larynx, and major salivary glands. The bone and connective tissue subgroup included cancers of bone and sarcoma. The hematological system subgroup included lymphoma and leukemia.

Baseline comorbidities were assessed for 2 years and included hypertension (ICD-9-CM codes 401-405), and dyslipidemia (ICD-9-CM code 272), liver disease (ICD-9-CM codes 070, 571), infertility (ICD-9-CM codes 628), kidney disease

1  
2  
3  
4 (ICD-9-CM codes 582-3, 585-6, 588).  
5

### 6 ***Statistical analysis*** 7

8  
9 Continuous variables were presented as the mean with SDs. The  $\chi^2$  test was used  
10  
11 to compare categorical variables, and the differences among continuous variables  
12  
13 were compared using the Student's t-test. The proportion of patients with cancer was  
14  
15 plotted by Kaplan–Meier curves with log-rank test constructed to compare the  
16  
17 cumulative incidence of any type of cancer between subjects with and without GDM.  
18  
19 The relative risk of cancer was estimated by Cox proportional regression analysis,  
20  
21 which was adjusted for potential confounding variables, such as age and  
22  
23 comorbidities. The statistical significance was inferred at a two-sided p value of  
24  
25 <0.05. All statistical analyses were performed using the Statistical Analysis Software  
26  
27 (SAS) System, V.9.4 (SAS Institute, Cary, North Carolina, USA). Kaplan-Meier  
28  
29 curves were plotted using Stata V.12 (Stata Corp, College Station, Texas, USA).  
30  
31  
32  
33  
34  
35  
36  
37  
38  
39  
40  
41  
42  
43  
44  
45  
46  
47  
48  
49  
50  
51  
52  
53  
54  
55  
56  
57  
58  
59  
60

## RESULTS

Table 1 lists the clinical characteristics of subjects. Overall, 990,572 women were analyzed. Among them, 47,373 women had GDM. The remaining 943,199 women without GDM served as controls. The average length of follow-up was  $6.84 \pm 3.05$  years, and mean age was  $28.97 \pm 4.91$  years. The incidence of GDM was 4.78% during the 11-year span. Women with GDM had a higher incidence of comorbidities than those in the control group, including hypertension, dyslipidemia, liver disease, infertility and kidney disease (Table 1).

Table 2 shows that the adjusted hazard ratio (AHR) of developing any type of cancer among women with GDM was 1.197 (95% CI, 1.125 to 1.274) compared to women without GDM after adjusting for age and comorbidities.

Patients with GDM were diagnosed with cancer ( $n=1,063$ , 2.24%) at a significantly higher rate than those patients without GDM ( $n=18,444$ , 1.96%;  $p<0.001$ ). (Table 3). Figure 2 shows the cumulative incidence rates of any type of cancer in patients with or without GDM from the index date until the first occurrence of cancer. The patients with GDM had higher cancer incidence rates compared with those patients without GDM (log-rank test:  $p<0.0001$ ).

Adjusting for maternal age at delivery, and comorbidities, women with a history of GDM had an increased risk of cancers, including cancers of nasopharynx (AHR,

1  
2  
3  
4 1.739; 95 % CI, 1.400 to 2.161;  $p < 0.0001$ ), kidney (AHR, 2.169; 95 % CI, 1.428 to  
5  
6 3.293,  $p = 0.0003$ ), lung and bronchus (AHR, 1.372; 95 % CI, 1.044 to 1.803;  
7  
8  $p = 0.0231$ ), breast (AHR, 1.234; 95 % CI, 1.093 to 1.393;  $p = 0.0007$ ), and thyroid  
9  
10 gland (AHR, 1.389; 95 % CI, 1.121 to 1.721;  $p = 0.0026$ ). (Table 3)  
11  
12  
13  
14  
15  
16  
17  
18  
19  
20  
21  
22  
23  
24  
25  
26  
27  
28  
29  
30  
31  
32  
33  
34  
35  
36  
37  
38  
39  
40  
41  
42  
43  
44  
45  
46  
47  
48  
49  
50  
51  
52  
53  
54  
55  
56  
57  
58  
59  
60

For peer review only



## DISCUSSION

The major findings of this study are as follows: [1] GDM is associated with a 19.7% higher risk of developing malignancy. [2] Women with GDM are at a higher risk of developing cancers of nasopharynx, lung and bronchus, kidney, breast, and thyroid glands.

One of our novel findings is that women with GDM are more likely to develop nasopharyngeal cancer (NPC) during the period of follow-up. NPC differs from other head and neck cancers in epidemiology, histology, natural history, and response to treatment. NPC is one of the neoplasms that are linked to infectious agents and displays a distinct racial and geographic distribution. While NPC is rare in Europe and America, it is endemic in Southeastern Asia including Taiwan where Epstein-Barr virus (EBV) infection is prevalent (15). The recrudescence of EBV in immunocompromised patients has been characterized by activating the expression of EBV latency genes, consequently immortalizing the infected cells and leading to carcinogenesis (16). Indeed, the immune dysfunction inherent to T2DM increases the susceptibility to various infections and risk of reactivating latent virus infections as well; eventually contributing to higher rates of mortality (17-20). It is unknown whether GDM, a pre-diabetes condition, is pathogenetically linked to reactivation of EBV infection and subsequent malignant transformation.

1  
2  
3  
4 Another novel finding in our study is that the risk of developing kidney cancer is  
5  
6 significantly higher in women with GDM, compared to those without GDM. The  
7  
8 etiology of kidney cancer remains elusive, but smoking, hypertension, obesity,  
9  
10 analgesics use, chronic kidney disease (CKD), and genetic defects are potential risk  
11  
12 factors (21, 22). Of these factors, obesity and hypertension also characterize GDM  
13  
14  
15 (1). Indeed, it has been shown that patients with T2DM have a higher risk of  
16  
17 developing kidney cancers (23, 24). In fact, GDM is associated with subsequent  
18  
19 development of T2DM and CKD (3, 25). It is unknown whether prevention of CKD  
20  
21 development of T2DM and CKD (3, 25). It is unknown whether prevention of CKD  
22  
23 would reduce the risk of kidney cancer in women with GDM.  
24  
25  
26  
27  
28

29 Our study is also the first to demonstrate the association between GDM and lung  
30  
31 cancers, which is the most common cancer around the world (26). The prevalence of  
32  
33 both lung cancer and GDM has been on the increase in Taiwan and worldwide (4, 27).  
34  
35 Whether this association is causal remains to be determined. Importantly, GDM and  
36  
37 lung cancer do share common risk factors such as smoking, dietary style, and obesity  
38  
39 (26, 28). It is unknown whether modification of these risk factors could impact this  
40  
41 association.  
42  
43  
44  
45  
46  
47  
48

49 In the present study, we also observed a clear association between GDM and  
50  
51 breast cancer. Previous studies on the association between GDM and breast cancer  
52  
53 have produced mixed results (7-12, 29-34). The reasons for the discrepancy are not  
54  
55  
56  
57  
58  
59  
60

1  
2  
3  
4 clear. They could be explained by methodological limitations. First, most of these  
5  
6 studies were based on self-reported information about GDM (9-11, 29, 31, 32, 34),  
7  
8 which is prone to recall bias. Secondly, small sample size and relatively rare  
9  
10 occurrence of cancer among young women may result in inadequate statistical power,  
11  
12 contributing to inconsistency. In these regards, our big database from Taiwan NHIRD  
13  
14 confers an advantage to overcome these methodological limitations.  
15  
16  
17

18  
19 In agreement with a previous study (8), we showed that GDM was associated with a  
20  
21 38.9% higher risk of developing thyroid cancer. Interestingly, a large study from  
22  
23 United States found that the risk of thyroid cancer was significantly increased in  
24  
25 women, but not in men, with diabetes (35). Taken together, women with GDM may  
26  
27 represent a readily recognizable subgroup that deserves a more intensive surveillance  
28  
29 for thyroid cancer.  
30  
31  
32  
33  
34  
35

36  
37 The elucidation of the relationship between GDM and later cancer risk may not  
38  
39 be straightforward. It is conceivable that GDM may impact subsequent cancer risk  
40  
41 through certain direct or indirect pathophysiological mechanisms such as  
42  
43 hyperglycemia, hyperinsulinemia secondary to insulin resistance and chronic  
44  
45 inflammation. Shared risk factors for GDM and cancers can be other explanations, for  
46  
47 example smoking, alcohol drinking, obesity, physical inactivity, hypertension and  
48  
49 dietary style.  
50  
51  
52  
53  
54  
55

1  
2  
3  
4 Insulin has mitogenic effects on cells (36). On the other hand, hyperglycemia can  
5  
6 induce production of reactive oxygen species (ROS), which can initiate  
7  
8 carcinogenesis by damaging cellular DNA (37, 38).  
9  
10

11  
12 Recently, the role of systemic inflammation in the pathogenesis of GDM has  
13  
14 gained more and more attention. Increased circulating levels of interleukin-6 (IL-6)  
15  
16 and C-reactive protein (CRP) have been observed in GDM independent of obesity  
17  
18 (39, 40), suggesting GDM as a state of low grade inflammation. Inflammation is also  
19  
20 a hallmark of cancer and is widely recognized to influence all cancer stages from cell  
21  
22 transformation to metastasis (41). Therefore, chronic and systemic inflammation may  
23  
24 represent the biological phenomenon linking GDM to cancer development. Future  
25  
26 investigations on the role of low-grade inflammation in GDM may help identify  
27  
28 biomarkers that can better predict, diagnose and monitor the evolution of GDM.  
29  
30 Moreover, specific inflammatory pathways may represent novel targets for treatment  
31  
32 and prevention of long-term adverse outcomes of GDM, including cancer  
33  
34 development.  
35  
36  
37  
38  
39  
40  
41  
42  
43  
44

45  
46 There were several strengths in this study. First, this is population-based study  
47  
48 with a large nationally representative sample from Taiwan NHIRD, thus making  
49  
50 selection bias minimized. Secondly, the use of NHIRD reduced the potential recall  
51  
52 bias that is inherent to self-reporting.  
53  
54  
55  
56  
57  
58  
59  
60

1  
2  
3  
4           Limitations of this study included the lack of information about the histology and  
5  
6           staging of cancer. Secondly, our study did not have information about potential  
7  
8  
9           confounders such as dietary, obesity, physical activity, smoking, alcohol consumption,  
10  
11  
12           environmental exposure and genetic parameters. Third, the follow-up period may not  
13  
14  
15           be long enough to allow detection of cancers in young women.  
16  
17  
18  
19

## 20           **CONCLUSIONS**

21  
22  
23           This population-based analysis of Taiwan NHIRD showed that women with  
24  
25  
26           GDM in Taiwan have an increased risk of developing malignancy including cancers  
27  
28  
29           of nasopharynx, lung, kidney, breast, and thyroid gland. Prevention of GDM may be  
30  
31  
32           an important strategy in curbing the development of certain types of cancers in the  
33  
34  
35           future. Our study also highlights under-recognized cancers in women with GDM that  
36  
37  
38           warrants further investigations to develop different surveillance strategies for cancer  
39  
40  
41           development in GDM patients in different ethnic groups.  
42  
43  
44  
45  
46  
47  
48  
49  
50  
51  
52  
53  
54  
55  
56  
57  
58  
59  
60

## Acknowledgements

This work was supported by grants from the Chang Gung Memorial Hospital (Grant CIRPD1D0031). The authors thank Research Services Center For Health Information, Chang Gung University for statistical consultation. This study was based in part on data from NHIRD. The interpretation and conclusions contained herein do not represent those of the National Health Insurance Administration, Department of Health, or National Health Research Institutes.

## Contributors

YSP proposed and designed the study. YSP also drafted the manuscript. MHT supervised the study and critically edited the manuscript; and finally approved the version to be submitted. JRL designed the study's analytic strategy and conducted the data analysis. BHC and CH contributed to study design and prepare the Methods and the Discussion sections of the text, YHL and CHS conducted literature review. All authors have read and approved the final manuscript.

## Funding

This work was supported by the Chang-Gung Memorial Hospital, grant number CIRPD1D0031.

**Competing interests**

The authors declare no conflict of interest.

**Ethics approval**

This study protocol was approved by the institutional review board of Chang Gung Medical Foundation (IRB 103-2572B).

**Provenance and peer review**

Not commissioned; externally peer reviewed.

**Data sharing statement**

No additional data are available.

## REFERENCES

1. International Association of Diabetes and Pregnancy Study Groups Consensus Panel, Metzger BE, Gabbe SG, Persson B, et al. International association of diabetes and pregnancy study groups recommendations on the diagnosis and classification of hyperglycemia in pregnancy. *Diabetes Care* 2010;33:676.
2. Dornhorst A, Paterson CM, Nicholls JS, et al. High prevalence of gestational diabetes in women from ethnic minority groups. *Diabet Med* 1992;9:820-5.
3. Chodick G, Elchalal U, Sella T, et al. The risk of overt diabetes mellitus among women with gestational diabetes: a population-based study. *Diabet Med* 2010;27:779-85.
4. Ferrara A. Increasing prevalence of gestational diabetes mellitus: a public health perspective. *Diabetes Care* 2007;30(Suppl 2):P141-6 .
5. Barone BB, Yeh HC, Snyder CF, et al. Long-term all-cause mortality in cancer patients with preexisting diabetes mellitus: a systematic review and meta-analysis. *JAMA* 2008;300:2754-64.
6. Stattin P, Björ O, Ferrari P, et al. Prospective study of hyperglycemia and cancer risk. *Diabetes Care* 2007;30:561-7.
7. Tong GX, Cheng J, Chai J, et al. Association between gestational diabetes mellitus and subsequent risk of cancer: a systematic review of epidemiological studies.



- 1  
2  
3  
4 Asian Pac *J Cancer Prev* 2014;15:4265-9.  
5  
6  
7 8. Bejaimal SA, Wu CF, Lowe J, et al. Short-term risk of cancer among women with  
8  
9 previous gestational diabetes: a population-based study. *Diabet Med*  
10  
11 2016;33:39-46.  
12  
13  
14  
15 9. Powe CE, Tobias DK, Michels KB, et al. History of Gestational Diabetes Mellitus  
16  
17 and Risk of Incident Invasive Breast Cancer among Parous Women in the Nurses'  
18  
19 Health Study II Prospective Cohort. *Cancer Epidemiol Biomarkers Prev*  
20  
21 2017;26:321-7.  
22  
23  
24  
25  
26 10. Park YM, O'Brien KM, Zhao S, et al. Gestational diabetes mellitus may be  
27  
28 associated with increased risk of breast cancer. *Br J Cancer* 2017;116:960-3.  
29  
30  
31  
32 11. Dawson SI. Long-term risk of malignant neoplasm associated with gestational  
33  
34 glucose intolerance. *Cancer* 2004;100,149-55.  
35  
36  
37  
38 12. Sella T, Chodick G, Barchana M, et al. Gestational diabetes and risk of incident  
39  
40 primary cancer: a large historical cohort study in Israel. *Cancer Causes Control*  
41  
42 2011;22,1513-20.  
43  
44  
45  
46 13. Chen YC, Yeh, H, Wu JC, et al. Taiwan's National Health Insurance Research  
47  
48 Database: Administrative health care database as study object in bibliometrics.  
49  
50  
51 *Scientometrics* 2011,86,365-80.  
52  
53  
54  
55 14. Hsing AW, Ioannidis JP. Nationwide population science: lessons from the Taiwan  
56  
57  
58  
59  
60

- 1  
2  
3  
4 National Health Insurance Research Database. *JAMA Intern Med*  
5  
6 2015;175:1527-9.  
7  
8  
9 15. Yu MC, Yuan JM. Epidemiology of nasopharyngeal carcinoma. *Semin Cancer*  
10  
11 *Biol* 2002;12:421-9.  
12  
13  
14  
15 16. Cohen JI. Epstein-Barr virus infection. *N Engl J Med* 2000;343:481-92.  
16  
17  
18 17. Plouffe JF, Silva J, Jr, Fekety R, et al. Cell-mediated immunity in diabetes  
19  
20 mellitus. *Infect Immun* 1978;21:425-9.  
21  
22  
23 18. Geerlings SE, Hoepelman AI. Immune dysfunction in patients with diabetes  
24  
25 mellitus (DM) FEMS *Immunol Med Microbiol*. 1999;26:259-65.  
26  
27  
28  
29 19. Berrou J, Fougeray S, Venot M, et al. Natural killer cell function, an important  
30  
31 target for infection and tumor protection, is impaired in type 2 diabetes. *PLoS One*  
32  
33 2013;8:e62418.  
34  
35  
36  
37 20. Kumar M, Roe K, Nerurkar PV, et al. Impaired virus clearance, compromised  
38  
39 immune response and increased mortality in type 2 diabetic mice infected with  
40  
41 West Nile virus. *PLoS One* 2012;7:e44682.  
42  
43  
44  
45  
46 21. Ljungberg B, Campbell SC, Choi HY, et al. The epidemiology of renal cell  
47  
48 carcinoma. *Eur Urol* 2011;60:615-21.  
49  
50  
51  
52 22. Chow WH, Dong LM, Devesa SS. Epidemiology and risk factors for kidney  
53  
54 cancer. *Nat Rev Urol* 2010;7:245-57.  
55  
56  
57  
58  
59  
60

- 1  
2  
3  
4 23. Larsson SC, Wolk A. Diabetes mellitus and incidence of kidney cancer: a  
5  
6 meta-analysis of cohort studies. *Diabetologia* 2011;54:1013-8.  
7  
8  
9 24. Tseng CH. Type 2 Diabetes Mellitus and Kidney Cancer Risk: A Retrospective  
10  
11 Cohort Analysis of the National Health Insurance. *PLoS One*  
12  
13 2015;11;10:e0142480.  
14  
15  
16  
17 25. Dehmer EW, Phadnis MA, Gunderson EP, et al. Association Between Gestational  
18  
19 Diabetes and Incident Maternal CKD: The Coronary Artery Risk Development in  
20  
21 Young Adults (CARDIA) Study. *Am J Kidney Dis* 2018;71:112-22.  
22  
23  
24  
25  
26 26. Dela Cruz CS, Tanoue LT, Matthay RA. Lung cancer: epidemiology, etiology, and  
27  
28 prevention. *Clin Chest Med* 2011;32:605-44.  
29  
30  
31  
32 27. Tseng CH. Diabetes but not insulin increases the risk of lung cancer: a Taiwanese  
33  
34 population-based study. *PLoS One* 2014;9:e101553.  
35  
36  
37  
38 28. Solomon CG, Willett WC, Carey VJ, et al. A prospective study of pregravid  
39  
40 determinants of gestational diabetes mellitus. *JAMA* 1997;278:1078-83.  
41  
42  
43 29. Troisi R, Weiss HA, Hoover RN, et al. Pregnancy characteristics and maternal risk  
44  
45 of breast cancer. *Epidemiology* 1998;9,641-7.  
46  
47  
48  
49 30. Cnattingius S, Torrang A, Ekblom A, et al. Pregnancy characteristics and maternal  
50  
51 risk of breast cancer. *JAMA* 2005;294,2474-80.  
52  
53  
54  
55 31. Brasky TM, Li Y, Jaworowicz DJ Jr, et al. Pregnancy-related characteristics and  
56  
57  
58  
59  
60

- 1  
2  
3  
4 breast cancer risk. *Cancer Causes Control* 2013;24,1675-85.  
5  
6  
7 32. Lawlor DA, Smith GD, Ebrahim S. Hyperinsulinaemia and increased risk of  
8  
9 breast cancer: findings from the British Women's Heart and Health Study. *Cancer*  
10  
11  
12 *Causes Control* 2004;15,267-75.  
13  
14  
15 33. Perrin MC, Terry MB, Kleinhaus K, et al. Gestational diabetes and the risk of  
16  
17 breast cancer among women in the Jerusalem Perinatal Study. *Breast Cancer Res*  
18  
19 *Treat* 2008;108,129-35.  
20  
21  
22  
23 34. Rollison DE, Giuliano AR, Sellers TA, et al. Population-based case-control study  
24  
25 of diabetes and breast cancer risk in Hispanic and non-Hispanic White women  
26  
27 living in US southwestern states. *Am J Epidemiol* 2008;167,447-56.  
28  
29  
30  
31  
32 35. Aschebrook-Kilfoy B, Sabra MM, Brenner A, et al. Diabetes and thyroid cancer  
33  
34 risk in the National Institutes of Health-AARP Diet and Health Study. *Thyroid*  
35  
36 2011;21:957-63.  
37  
38  
39  
40 36. Vigneri P, Frasca F, Siacca L, et al. Diabetes and cancer. *Endocr. Relat. Cancer*  
41  
42 2009;16,1103-23.  
43  
44  
45  
46 37. Chandrasekaran K, Swaminathan K, Chatterjee S, et al. Apoptosis in hepG2 cells  
47  
48 exposed to high glucose. *Toxicol. In Vitro* 2010;24,387-96.  
49  
50  
51  
52 38. Zhang Y, Zhou J, Wang T, Cai T. High level glucose increases mutagenesis in  
53  
54 human lymphoblastoid cells. *Int. J. Biol. Sci.* 2007;3,275-9.  
55  
56  
57  
58  
59  
60

- 1  
2  
3  
4 39. Ategbo JM, Grissa O, Yessoufou A, et al. Modulation of adipokines and cytokines  
5  
6 in gestational diabetes and macrosomia. *J Clin Endocrinol Metab*  
7  
8  
9 2006;91:4137e43.  
10  
11  
12 40. Wolf M, Sandler L, Hsu K, et al. First-trimester C-reactive protein and subsequent  
13  
14 gestational diabetes. *Diabetes Care* 2003;26:819-24.  
15  
16  
17 41. Leonardi GC, Accardi G, Monastero R, et al. Ageing: from inflammation to  
18  
19 cancer. *Immun Ageing* 2018;15:1.  
20  
21  
22  
23  
24  
25  
26  
27  
28  
29  
30  
31  
32  
33  
34  
35  
36  
37  
38  
39  
40  
41  
42  
43  
44  
45  
46  
47  
48  
49  
50  
51  
52  
53  
54  
55  
56  
57  
58  
59  
60

Table 1 Baseline characteristics

|                                         | Pregnancy women<br>with GDM |            | Pregnancy women<br>without GDM |            | P value |
|-----------------------------------------|-----------------------------|------------|--------------------------------|------------|---------|
| Number of population, n (%)             | 47373                       | (4.78)     | 943199                         | (95.22)    |         |
| Age, y, mean±SD                         |                             | 31.61±4.54 |                                | 28.83±4.89 | <.0001  |
| Age at pregnancy, n (%)                 |                             |            |                                |            | <.0001  |
| ≤ 20                                    | 407                         | (0.86)     | 45942                          | (4.87)     |         |
| 21-30                                   | 18617                       | (39.30)    | 558108                         | (59.17)    |         |
| 31-40                                   | 27203                       | (57.42)    | 329929                         | (34.98)    |         |
| 41-50                                   | 1146                        | (2.42)     | 9220                           | (0.98)     |         |
| Comorbidity, n (%)                      |                             |            |                                |            |         |
| Hypertension (icd9 401-405)             | 1479                        | (3.12)     | 7743                           | (0.82)     | <.0001  |
| Dyslipidemia (icd9 272)                 | 1132                        | (2.39)     | 8197                           | (0.87)     | <.0001  |
| Liver disease (icd9 070, 571)           | 3165                        | (6.68)     | 44509                          | (4.72)     | <.0001  |
| Infertility, female (icd9 628)          | 8001                        | (16.89)    | 94405                          | (10.01)    | <.0001  |
| Kidney disease (icd9 582-3, 585-6, 588) | 51                          | (0.11)     | 626                            | (0.07)     | 0.0008  |

SD=Standard Deviation

Table 2 Hazard ratio (HR) of developing cancer in relation to baseline characteristics of study participants:

|                                         | Crude HR<br>(95% CI) | P value | Adjusted HR<br>(95% CI) | P value |
|-----------------------------------------|----------------------|---------|-------------------------|---------|
| <b>Patients</b>                         |                      |         |                         |         |
| GDM                                     | 1.421 (1.336-1.512)  | <0.0001 | 1.197 (1.125-1.274)     | 0.0012  |
| Non-GDM                                 | 1.0 (ref)            |         | 1.0 (ref)               |         |
| <b>Age</b>                              |                      |         |                         |         |
| ≤ 20                                    | 1.0 (ref)            |         | 1.0 (ref)               |         |
| 21-30                                   | 1.627 (1.488-1.779)  | <0.0001 | 1.581 (1.446-1.729)     | <0.0001 |
| 31-40                                   | 2.843 (2.600-3.109)  | <0.0001 | 2.678 (2.448-2.930)     | <0.0001 |
| 41-50                                   | 4.883 (4.291-5.556)  | <0.0001 | 4.479 (3.933-5.100)     | <0.0001 |
| <b>Comorbidity, n (%)</b>               |                      |         |                         |         |
| Hypertension (icd9 401-405)             | 1.471 (1.291-1.677)  | <0.0001 | 1.114 (0.976-1.272)     | 0.1101  |
| Dyslipidemia (icd9 272)                 | 1.866 (1.648-2.113)  | <0.0001 | 1.395 (1.229-1.583)     | <0.0001 |
| Liver disease (icd9 070, 571)           | 1.573 (1.486-1.665)  | <0.0001 | 1.432 (1.351-1.517)     | <0.0001 |
| Infertility, female (icd9 628)          | 1.397 (1.340-1.457)  | <0.0001 | 1.185 (1.136-1.236)     | <0.0001 |
| Kidney disease (icd9 582-3, 585-6, 588) | 2.077 (1.403-3.073)  | 0.0003  | 1.623 (1.095-2.404)     | 0.0159  |

Model was adjusted for age, hypertension, dyslipidemia, liver disease, infertility, and kidney disease;

HR=Hazard Ratio.

Table 3 Hazard ratio (HR) of the first cancer diagnosis between GDM group and non GDM groups

| (ICD-9 code)                       | Women<br>with GDM<br>(N=47373) | Women<br>without GDM<br>(N=943199) | Crude HR<br>(95% CI) | P value | Adjusted HR<br>(95% CI) | P value |
|------------------------------------|--------------------------------|------------------------------------|----------------------|---------|-------------------------|---------|
| <b>Head and neck</b>               |                                |                                    |                      |         |                         |         |
| Oral & pharynx (140-143-6, 148-9)* | 19 (0.04)                      | 389 (0.04)                         | 1.230 (0.776-1.950)  | 0.380   | 1.105 (0.695-1.759)     | 0.6724  |
| Nasopharynx (147)*                 | 90 (0.19)                      | 1151 (0.12)                        | 1.897 (1.530-2.351)  | <.0001  | 1.739 (1.400-2.161)     | <.0001  |
| Larynx (161)*                      | 5 (0.01)                       | 84 (0.01)                          | 1.494 (0.605-3.686)  | 0.384   | 1.562 (0.628-3.877)     | 0.3379  |
| Major salivary gland (142)*        | 5 (0.01)                       | 69 (0.01)                          | 1.774 (0.715-4.402)  | 0.216   | 1.476 (0.591-3.688)     | 0.4044  |
| <b>Digestive system</b>            |                                |                                    |                      |         |                         |         |
| Esophagus (150)*                   | 3 (0.01)                       | 88 (0.01)                          | 0.748 (0.237-2.363)  | 0.620   | 0.554 (0.175-1.756)     | 0.3157  |
| Stomach (151)*                     | 18 (0.04)                      | 256 (0.03)                         | 1.703 (1.056-2.749)  | 0.029   | 1.322 (0.816-2.142)     | 0.2570  |
| Colorectum (153-4)*                | 100 (0.21)                     | 1705 (0.18)                        | 1.420 (1.160-1.738)  | 0.0007  | 1.180 (0.963-1.447)     | 0.1099  |
| Liver (155)*                       | 87 (0.18)                      | 1393 (0.15)                        | 1.504 (1.211-1.868)  | 0.0002  | 1.242 (0.998-1.545)     | 0.0521  |
| Biliary system (156)*              | 4 (0.01)                       | 43 (<0.01)                         | 2.329 (0.835-6.496)  | 0.106   | 1.954 (0.692-5.516)     | 0.2058  |
| Pancreas (157)*                    | 17 (0.04)                      | 314 (0.03)                         | 1.316 (0.808-2.145)  | 0.270   | 1.072(0.655-1.755)      | 0.7807  |
| <b>Genital system</b>              |                                |                                    |                      |         |                         |         |
| Cervix uteri (180)*                | 37 (0.08)                      | 962 (0.10)                         | 0.925 (0.666-1.285)  | 0.643   | 0.903 (0.649-1.256)     | 0.5438  |
| Uterus (179,182)*                  | 42 (0.09)                      | 803 (0.09)                         | 1.323 (0.970-1.805)  | 0.077   | 1.051 (0.769-1.437)     | 0.7534  |
| Ovary (183)*                       | 50 (0.11)                      | 1146 (0.12)                        | 1.061 (0.800-1.409)  | 0.680   | 0.963 (0.724-1.280)     | 0.7928  |
| <b>Urinary system</b>              |                                |                                    |                      |         |                         |         |
| Urinary bladder (188)*             | 9 (0.02)                       | 162 (0.02)                         | 1.387 (0.709-2.715)  | 0.340   | 1.034 (0.525-2.033)     | 0.9236  |
| Kidney (189)*                      | 25 (0.05)                      | 245 (0.03)                         | 2.573 (1.704-3.885)  | <.0001  | 2.169 (1.428-3.293)     | 0.0003  |
| <b>Hematological system</b>        |                                |                                    |                      |         |                         |         |
| Leukemia (204-8)*                  | 11 (0.02)                      | 359 (0.04)                         | 0.742 (0.407-1.352)  | 0.329   | 0.735 (0.402-1.344)     | 0.3169  |
| Lymphoma (200-3)*                  | 19 (0.04)                      | 596 (0.06)                         | 0.771 (0.488-1.217)  | 0.264   | 0.774 (0.489-1.226)     | 0.2754  |
| <b>Bone and connective tissue</b>  |                                |                                    |                      |         |                         |         |
| Bone (170)*                        | 4 (0.01)                       | 96 (0.01)                          | 0.992 (0.365-2.699)  | 0.988   | 0.977 (0.357-2.677)     | 0.9646  |
| Sarcoma (171)*                     | 3 (0.01)                       | 175 (0.02)                         | 0.412 (0.132-1.289)  | 0.128   | 0.387 (0.123-1.217)     | 0.1045  |
| <b>Lung and bronchus (162)*</b>    | 56 (0.12)                      | 846 (0.09)                         | 1.666 (1.271-2.184)  | 0.0002  | 1.372 (1.044-1.803)     | 0.0231  |
| <b>Skin (173)*</b>                 | 15 (0.03)                      | 201 (0.02)                         | 1.834 (1.085-3.101)  | 0.024   | 1.664 (0.980-2.825)     | 0.0594  |
| <b>Breast (174)*</b>               | 284 (0.60)                     | 4373 (0.46)                        | 1.654 (1.467-1.866)  | <.0001  | 1.234 (1.093-1.393)     | 0.0007  |
| <b>Brain (191)*</b>                | 19 (0.04)                      | 331 (0.04)                         | 1.382 (0.870-2.195)  | 0.170   | 1.232 (0.772-1.968)     | 0.3818  |
| <b>Thyroid (193)*</b>              | 91 (0.19)                      | 1423 (0.15)                        | 1.582 (1.279-1.956)  | <.0001  | 1.389 (1.121-1.721)     | 0.0026  |
| <b>Other sites</b>                 | 74 (0.16)                      | 1435 (0.15)                        | 1.046 (0.799-1.370)  | 0.743   | 0.967 (0.737-1.269)     | 0.8104  |
| <b>Total (140-208)</b>             | 1063 (2.24)                    | 18444 (1.96)                       | 1.421 (1.336-1.512)  | <.0001  | 1.197 (1.125-1.274)     | <.0001  |



**LEGENDS:**

Figure 1: Flow chart for selection of study population

Figure 2: The cumulative incidence rates of any type of cancer in patients with or without GDM from the index date until the first occurrence of the cancer using Kaplan-Meier methods.

For peer review only

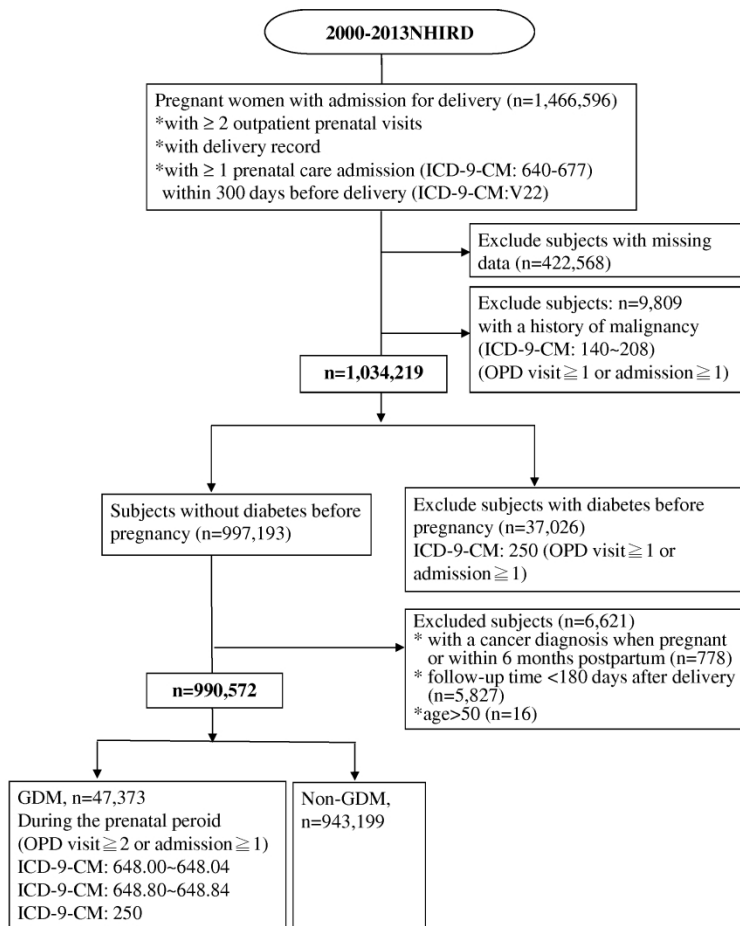

Figure 1

209x297mm (300 x 300 DPI)

1  
2  
3  
4  
5  
6  
7  
8  
9  
10  
11  
12  
13  
14  
15  
16  
17  
18  
19  
20  
21  
22  
23  
24  
25  
26  
27  
28  
29  
30  
31  
32  
33  
34  
35  
36  
37  
38  
39  
40  
41  
42  
43  
44  
45  
46  
47  
48  
49  
50  
51  
52  
53  
54  
55  
56  
57  
58  
59  
60

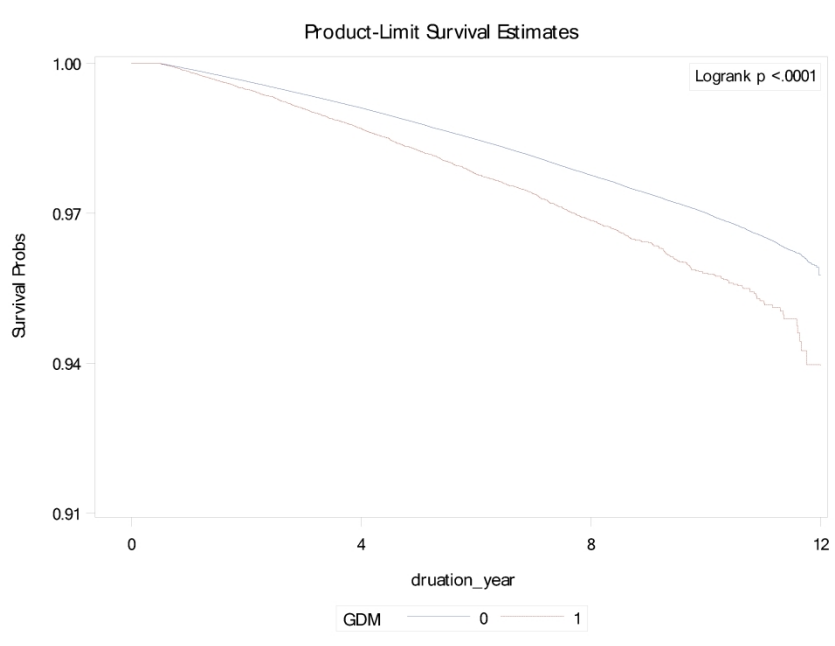

Figure 2  
297x209mm (300 x 300 DPI)

**STROBE 2007 (v4) Statement—Checklist of items that should be included in reports of *cohort studies***

| Section/Topic                | Item # | Recommendation                                                                                                                                                                       | Reported on page # |
|------------------------------|--------|--------------------------------------------------------------------------------------------------------------------------------------------------------------------------------------|--------------------|
| Title and abstract           | 1      | (a) Indicate the study's design with a commonly used term in the title or the abstract                                                                                               | 1,4                |
|                              |        | (b) Provide in the abstract an informative and balanced summary of what was done and what was found                                                                                  | 4-5                |
| <b>Introduction</b>          |        |                                                                                                                                                                                      |                    |
| Background/rationale         | 2      | Explain the scientific background and rationale for the investigation being reported                                                                                                 | 7-8                |
| Objectives                   | 3      | State specific objectives, including any prespecified hypotheses                                                                                                                     | 8                  |
| <b>Methods</b>               |        |                                                                                                                                                                                      |                    |
| Study design                 | 4      | Present key elements of study design early in the paper                                                                                                                              | 9-10               |
| Setting                      | 5      | Describe the setting, locations, and relevant dates, including periods of recruitment, exposure, follow-up, and data collection                                                      | 9-11               |
| Participants                 | 6      | (a) Give the eligibility criteria, and the sources and methods of selection of participants. Describe methods of follow-up                                                           | 10-11              |
|                              |        | (b) For matched studies, give matching criteria and number of exposed and unexposed                                                                                                  | N/A                |
| Variables                    | 7      | Clearly define all outcomes, exposures, predictors, potential confounders, and effect modifiers. Give diagnostic criteria, if applicable                                             | 11-12              |
| Data sources/<br>measurement | 8*     | For each variable of interest, give sources of data and details of methods of assessment (measurement). Describe comparability of assessment methods if there is more than one group | 10-12              |
| Bias                         | 9      | Describe any efforts to address potential sources of bias                                                                                                                            | 10-12              |
| Study size                   | 10     | Explain how the study size was arrived at                                                                                                                                            | 10                 |
| Quantitative variables       | 11     | Explain how quantitative variables were handled in the analyses. If applicable, describe which groupings were chosen and why                                                         | 12                 |
| Statistical methods          | 12     | (a) Describe all statistical methods, including those used to control for confounding                                                                                                | 11-12              |
|                              |        | (b) Describe any methods used to examine subgroups and interactions                                                                                                                  | 12                 |
|                              |        | (c) Explain how missing data were addressed                                                                                                                                          | 10                 |
|                              |        | (d) If applicable, explain how loss to follow-up was addressed                                                                                                                       | N/A                |
|                              |        | (e) Describe any sensitivity analyses                                                                                                                                                | N/A                |
| <b>Results</b>               |        |                                                                                                                                                                                      |                    |

|                          |     |                                                                                                                                                                                                              |               |
|--------------------------|-----|--------------------------------------------------------------------------------------------------------------------------------------------------------------------------------------------------------------|---------------|
| Participants             | 13* | (a) Report numbers of individuals at each stage of study—eg numbers potentially eligible, examined for eligibility, confirmed eligible, included in the study, completing follow-up, and analysed            | 13            |
|                          |     | (b) Give reasons for non-participation at each stage                                                                                                                                                         | N/A           |
|                          |     | (c) Consider use of a flow diagram                                                                                                                                                                           | 10, See Fig 1 |
| Descriptive data         | 14* | (a) Give characteristics of study participants (eg demographic, clinical, social) and information on exposures and potential confounders                                                                     | 13,28-29      |
|                          |     | (b) Indicate number of participants with missing data for each variable of interest                                                                                                                          | 13            |
|                          |     | (c) Summarise follow-up time (eg, average and total amount)                                                                                                                                                  | 13            |
| Outcome data             | 15* | Report numbers of outcome events or summary measures over time                                                                                                                                               | 13-14         |
| Main results             | 16  | (a) Give unadjusted estimates and, if applicable, confounder-adjusted estimates and their precision (eg, 95% confidence interval). Make clear which confounders were adjusted for and why they were included | 13-14, 28-30  |
|                          |     | (b) Report category boundaries when continuous variables were categorized                                                                                                                                    | 13, 28        |
|                          |     | (c) If relevant, consider translating estimates of relative risk into absolute risk for a meaningful time period                                                                                             | 13-14, 29-30  |
| Other analyses           | 17  | Report other analyses done—eg analyses of subgroups and interactions, and sensitivity analyses                                                                                                               | 13, See Fig 2 |
| <b>Discussion</b>        |     |                                                                                                                                                                                                              |               |
| Key results              | 18  | Summarise key results with reference to study objectives                                                                                                                                                     | 15            |
| <b>Limitations</b>       |     |                                                                                                                                                                                                              |               |
| Interpretation           | 20  | Give a cautious overall interpretation of results considering objectives, limitations, multiplicity of analyses, results from similar studies, and other relevant evidence                                   | 19            |
| Generalisability         | 21  | Discuss the generalisability (external validity) of the study results                                                                                                                                        | 19            |
| <b>Other information</b> |     |                                                                                                                                                                                                              |               |
| Funding                  | 22  | Give the source of funding and the role of the funders for the present study and, if applicable, for the original study on which the present article is based                                                | 20            |

\*Give information separately for cases and controls in case-control studies and, if applicable, for exposed and unexposed groups in cohort and cross-sectional studies.

**Note:** An Explanation and Elaboration article discusses each checklist item and gives methodological background and published examples of transparent reporting. The STROBE checklist is best used in conjunction with this article (freely available on the Web sites of PLoS Medicine at <http://www.plosmedicine.org/>, Annals of Internal Medicine at <http://www.annals.org/>, and Epidemiology at <http://www.epidem.com/>). Information on the STROBE Initiative is available at [www.strobe-statement.org](http://www.strobe-statement.org).

# BMJ Open

## Incidence and relative risk for developing cancers in women with gestational diabetes mellitus: a nationwide cohort study in Taiwan

|                                 |                                                                                                                                                                                                                                                                                                                                                                                                                                                                                                                                                                                                                                                                                                                                                                                                                                            |
|---------------------------------|--------------------------------------------------------------------------------------------------------------------------------------------------------------------------------------------------------------------------------------------------------------------------------------------------------------------------------------------------------------------------------------------------------------------------------------------------------------------------------------------------------------------------------------------------------------------------------------------------------------------------------------------------------------------------------------------------------------------------------------------------------------------------------------------------------------------------------------------|
| Journal:                        | <i>BMJ Open</i>                                                                                                                                                                                                                                                                                                                                                                                                                                                                                                                                                                                                                                                                                                                                                                                                                            |
| Manuscript ID                   | bmjopen-2018-024583.R1                                                                                                                                                                                                                                                                                                                                                                                                                                                                                                                                                                                                                                                                                                                                                                                                                     |
| Article Type:                   | Research                                                                                                                                                                                                                                                                                                                                                                                                                                                                                                                                                                                                                                                                                                                                                                                                                                   |
| Date Submitted by the Author:   | 14-Oct-2018                                                                                                                                                                                                                                                                                                                                                                                                                                                                                                                                                                                                                                                                                                                                                                                                                                |
| Complete List of Authors:       | Peng, Yun-Shing; Chiayi Chang Gung Memorial Hospital, Division of Endocrinology and Metabolism, Department of Internal Medicine; Chang Gung University<br>Lin, Jr-Rung; Chang Gung University, Clinical Informatics and Medical Statistics Research Center<br>Cheng, Bi-Hua; Chiayi Chang Gung Memorial Hospital, Department of Obstetrics and Gynecology<br>Ho, Cheng; Chiayi Chang Gung Memorial Hospital, Division of Endocrinology and Metabolism, Department of Internal Medicine<br>Lin, Yung-Hsiang; Chiayi Chang Gung Memorial Hospital, Division of Endocrinology and Metabolism, Department of Internal Medicine<br>Shen, Chien-Hen; Chiayi Chang Gung Memorial Hospital, Department of internal medicine<br>Tsai, Ming-Hung; Chang Gung Memorial Hospital Linkou Branch, Department of Internal Medicine; Chang Gung University |
| <b>Primary Subject Heading</b>: | Diabetes and endocrinology                                                                                                                                                                                                                                                                                                                                                                                                                                                                                                                                                                                                                                                                                                                                                                                                                 |
| Secondary Subject Heading:      | Public health                                                                                                                                                                                                                                                                                                                                                                                                                                                                                                                                                                                                                                                                                                                                                                                                                              |
| Keywords:                       | Diabetes in pregnancy < DIABETES & ENDOCRINOLOGY, cancer, population-based cohort study                                                                                                                                                                                                                                                                                                                                                                                                                                                                                                                                                                                                                                                                                                                                                    |
|                                 |                                                                                                                                                                                                                                                                                                                                                                                                                                                                                                                                                                                                                                                                                                                                                                                                                                            |

SCHOLARONE™  
Manuscripts

**Article title**

Incidence and relative risk for developing cancers in women with gestational diabetes mellitus: a nationwide cohort study in Taiwan

**Running title:**

Increased risk of cancer with previous gestational diabetes

**Authors:**

Yun-Shing Peng,<sup>1,2</sup> Jr Rung Lin<sup>2,3</sup>, Bi-Hua Cheng<sup>4</sup>, Cheng Ho<sup>1</sup>, Yung-Hsiang Lin<sup>1</sup>,  
Chien-Hen Shen<sup>5</sup>, Ming-Hung Tsai<sup>2,6</sup>

<sup>1</sup>Division of Endocrinology and Metabolism, Department of internal medicine, Chang Gung Memorial Hospital, Chiayi, Taiwan.

<sup>2</sup>Chang Gung University, College of Medicine, Taoyuan, Taiwan

<sup>3</sup>Clinical Informatics and Medical Statistics Research Center and Graduate Institute of Clinical Medicine, Chang Gung University, Taoyuan, Taiwan

<sup>4</sup>Department of Obstetrics and Gynecology, Chang Gung Memorial Hospital, Chiayi, Taiwan.

<sup>5</sup>Department of internal medicine, Chang Gung Memorial Hospital, Chiayi, Taiwan.

<sup>6</sup>Department of internal medicine, Chang Gung Memorial Hospital, Linkuo medical

1  
2  
3  
4 center, Taoyuan, Taiwan.  
5  
6  
7  
8  
9

10 **Corresponding author:**  
11

12  
13 Ming-Hung Tsai, MD  
14

15  
16 Department of internal medicine  
17

18  
19 Chang Gung Memorial Hospital, Linkuo Medical Center  
20

21  
22 Chang Gung University  
23

24  
25 No.5, Fu-Hsing Street, Guishan District, Taoyuan, Taiwan  
26

27  
28 Tel: +886-3-3281200 ext. 8108  
29

30  
31 Fax: +886-3-3288662  
32

33  
34 E-mail: mh-tsai@cgmh.org.tw  
35  
36  
37  
38  
39

40 **Word count**  
41

42  
43 2824  
44  
45

46 **Number of tables**  
47

48  
49 3  
50

51 **Number of Figures**  
52

53  
54  
55 2  
56  
57



## Abbreviations

GDM, Gestational diabetes mellitus; T2DM, type 2 diabetes mellitus; NHIRD, National Health Insurance Research Database; ICD-9-CM, International Classification of Disease, 9th Revision, Clinical Modification; OPD, outpatient department; AHR, adjusted hazard ratio.

## Conflict of interest

The authors declare no conflict of interest.

## ABSTRACT

### Objectives:

To evaluate the risk of developing cancers, particularly site-specific cancers, in women with gestational diabetes mellitus (GDM) in Taiwan.

### Setting:

The National Health Insurance Research Database (NHIRD) of Taiwan.

### Participants

This study was conducted using the nationwide data from 2000 to 2013. In total, 1,466,596 pregnant women with admission for delivery were identified. Subjects with GDM consisted of 47,373 women, while the non-exposed group consisted of 943,199 women without GDM. The participants were followed from the delivery date to the diagnosis of cancer, death, the last medical claim or the end of follow-up (December 31 2013), whichever came first.

### Primary outcome measures:

Patients with a new diagnosis of cancer (ICD-9-CM codes 140–208) recorded in NHIRD were identified. The risk of 11 major cancer types was assessed, including cancers of head and neck, digestive organs, lung and bronchus, bone and connective tissue, skin, breast, genital organs, urinary system, brain, thyroid gland, and hematological system.

**Results:**

The rates of developing cancers were significantly higher in women with GDM compared to non-GDM group (2.24% vs. 1.96%;  $p < 0.001$ ). After adjusting for maternal age at delivery and comorbidities, women with GDM had increased risk of cancers, including cancers of nasopharynx (adjusted hazard ratio (AHR), 1.739; 95 % CI, 1.400 to 2.161;  $p < 0.0001$ ), kidney (AHR, 2.169; 95 % CI, 1.428 to 3.293;  $p = 0.0003$ ), lung and bronchus (AHR, 1.372; 95 % CI, 1.044 to 1.803;  $p = 0.0231$ ), breast (AHR, 1.234; 95 % CI, 1.093 to 1.393;  $p = 0.007$ ), and thyroid gland (AHR, 1.389; 95 % CI, 1.121 to 1.721;  $p = 0.0026$ ).

**Conclusion:**

Women with GDM have a higher risk of developing cancers. Cancer screening is warranted in women with GDM. Future research should be aimed to establish whether this association is causal.

**Keywords :** Gestational diabetes, Cancer, National health insurance research database

### Strengths and limitations of this study

- Our study represents the first one to document that women with GDM have a higher risk of developing cancers of nasopharynx, lung and bronchus, and kidney.
- This nationwide population-based cohort study included more than one million women, making selection bias minimal.
- The use of big data from Taiwan NHIRD also decreased the risk of recall bias which is inherent to self-reporting, thus making our findings potentially generalizable.
- The data from NHIRD lack information on other factors that may be associated with GDM and cancer, such as smoking, alcohol consumption, obesity, dietary style, environmental exposure, genetic parameters, subtypes of cancer, and family history of cancers.
- The relatively short follow-up period ( $6.84\pm 3.05$  years) in our study may not have allowed some slow-growing cancers to be detected.

## INTRODUCTION

Pregnancy is normally accompanied by insulin resistance, which is facilitated by placental production of diabetogenic hormones. Gestational diabetes mellitus (GDM) develops in pregnant women whose pancreatic islet function is inadequate to overcome the insulin resistance that accompanies pregnancy (1). GDM is associated with adverse outcomes of pregnancy, for example, preeclampsia, macrosomia, and cesarean delivery (1). The prevalence of GDM varies worldwide and among racial and ethnic groups (2), and is generally in parallel with the prevalence of type 2 diabetes (T2DM). Indeed, it has been shown that women diagnosed with GDM are at lifetime risk of developing T2DM subsequently (3). Lately, the prevalence of GDM has been on the rise (4). The reasons for this phenomenon may be an increase in maternal age, obesity issues and a decrease in daily physical activity.

Accumulating lines of evidence have demonstrated an association between T2DM and certain types of cancers. Although the exact causes for this phenomenon are not yet fully understood, chronic hyperinsulinemia which is prompted by insulin resistance has been proposed to be the major channel through which T2DM can trigger tumor growth. Some studies, although not all, suggested that T2DM may contribute to an increased mortality (5). Interestingly, the increase in cancer risk has been found not only in T2DM

1  
2  
3  
4 but also in pre-diabetes (6). GDM is characterized by hyperglycemia, insulin resistance,  
5  
6  
7 hyperinsulinemia and increased levels of Insulin-like growth factor 1 (IGF-1), which can  
8  
9  
10 potentially lead to uncontrolled growth of cells and cancer (1, 7). Since GDM has the  
11  
12  
13 same characteristics as T2DM and is a predictor for subsequent overt T2DM, it is  
14  
15  
16 plausible that GDM may represent a risk factor for the future cancers. Indeed, several  
17  
18  
19 studies have been conducted to address whether GDM increases risk of cancer, but  
20  
21  
22 yielded mixed results probably because of methodological limitations such as self-  
23  
24  
25 reported GDM information, relatively small population and insufficient statistical power  
26  
27  
28 resulting from rare occurrence of cancers among young women (7-13).

31 Most previous studies focused on the association between GDM and breast cancer.  
32  
33  
34 Only a few have investigated the relationship between GDM and other types of cancers.  
35  
36  
37 Moreover, few studies on the association between cancer and GDM have been carried out  
38  
39  
40 in Asia-Pacific region where certain types of cancer are particularly prevalent. Therefore,  
41  
42  
43 it is unknown whether currently available data can be generalized to different ethnic  
44  
45  
46 groups.

49 The aim of this study was to determine the risk of developing cancers particularly  
50  
51  
52 site-specific cancers in women with prior GDM using the National Health Insurance  
53  
54  
55 Research Database (NHIRD), which was created by National Health Research Institutes

1  
2  
3  
4  
5  
6  
7  
8  
9  
10  
11  
12  
13  
14  
15  
16  
17  
18  
19  
20  
21  
22  
23  
24  
25  
26  
27  
28  
29  
30  
31  
32  
33  
34  
35  
36  
37  
38  
39  
40  
41  
42  
43  
44  
45  
46  
47  
48  
49  
50  
51  
52  
53  
54  
55  
56  
57  
58  
59  
60

(NHRI) for academic research (14).

For peer review only

## MATERIALS AND METHODS

### *Ethics statement*

This study was granted a waiver for the requirement for informed consents by the Institutional Review Board of Chang Gung memorial Hospital (IRB: 103-2572B) because all data in the NHIRD were anonymized and de-identified before release.

### *Source of data*

Data in NHIRD were used. NHIRD contains the registration files and original claim data for reimbursements from the national health insurance (NHI) program of Taiwan; This NHI program was implemented in 1995; and covers 99.5% of the 23 million residents in Taiwan. NHI program offers a comprehensive, unified, and universal health insurance program to all citizens. The coverage includes outpatient service, inpatient care, dental care, childbirth, physical therapy, preventive health care, home care, and rehabilitation for chronic mental illnesses (15). The database provides all dates of inpatient and outpatient services, diagnosis, prescriptions, examinations, operations, and expenditures, and is updated biannually.

### *Patient and public involvement*

In the present study, we used NHIRD, which is the data of insurance claims with anonymised identifications. No patients or public were involved.



1  
2  
3  
4  
5  
6  
7 ***Study groups:***  
8  
9

10 This study used data published by the NHRI in Taiwan and covered the years from  
11  
12 2000 to 2013. The diagnostic coding of the NHI in Taiwan was performed according to  
13  
14 the International Classification of Disease, 9th Revision, Clinical Modification (ICD-9-  
15  
16 CM) diagnostic criteria.  
17  
18  
19  
20  
21

22 ***Inclusion and exclusion criteria:***  
23  
24

25 A total of 1,466,596 pregnant women with admission for delivery were found in the  
26  
27 NHIRD between Jan 1, 2000 and Dec 31, 2013 (Figure 1). Subjects were traced back 2  
28  
29 years before delivery to identify if there was a past history of malignancy or diabetes and  
30  
31 assess baseline comorbidities which may confound the association between GDM and  
32  
33 malignancy. In this context, women with admission for delivery between Jan 1, 2002 and  
34  
35 Dec 31, 2012 were further analyzed to avoid pre-existing malignancy and ensure  
36  
37 adequate period of time in follow-up. Among these women, we identified 47,373 women  
38  
39 who had been diagnosed with gestational diabetes (ICD-9-CM code 648, 250), and had at  
40  
41 least 2 consensus diagnoses at prenatal outpatient visits or at least one diagnosis at  
42  
43 inpatient admissions during the prenatal period to ensure the validity of diagnosis.  
44  
45  
46  
47  
48  
49  
50  
51  
52  
53  
54

55 (Fig.1). The remaining 943,199 women without GDM, diabetes or malignancy were used  
56  
57  
58  
59  
60

1  
2  
3  
4 as the non-exposed group. The incidence of GDM was 4.78 in 100 deliveries during the  
5  
6  
7 11-year span (Table 1).  
8  
9

10 Those women who were not admitted for delivery within the time frame between Jan  
11  
12 1, 2002 and Dec 31, 2012 were excluded (n=422,568). Subjects with a history of  
13  
14 malignancy (ICD-9-CM codes 140 to 208) (n=9,809) two years before delivery, or  
15  
16 diabetes (ICD-9-CM codes 250) (n=37,026) before pregnancy were excluded. The date of  
17  
18 delivery was set as the index date. To avoid inclusion of patients with cancers that arose  
19  
20 during or before pregnancy, GDM and the non-exposed participants were followed for  
21  
22 180 days after delivery until malignancy diagnosis, death, the last medical claim or the  
23  
24 end of study follow-up (December 31, 2013), whichever came first. We excluded the  
25  
26 women with a cancer diagnosis during pregnancy or within 180 days postpartum.  
27  
28 (n=778). 5,827 patients were also excluded due to loss of follow-up within 180 days after  
29  
30 delivery.  
31  
32  
33  
34  
35  
36  
37  
38  
39  
40  
41  
42

### 43 ***Primary outcome***

44  
45  
46 The primary outcome was defined as a new diagnosis of any cancer (ICD-9-CM  
47  
48 codes 140–208) recorded in NHIRD between Jan 1, 2002 and Dec 31, 2013.  
49  
50

### 51 ***Sub-classification of Cancers***

52  
53  
54  
55 We classified cancers into the 11 groups as previously described (12), on basis of the  
56  
57

1  
2  
3  
4 ICD-9-CM: cancers of head and neck, digestive organs, lung and bronchus, bone and  
5  
6  
7 connective tissue, skin, breast, genital organs, urinary system, brain, thyroid gland, and  
8  
9  
10 hematological system.

11  
12  
13 Baseline comorbidities were assessed for 2 years and included hypertension (ICD-9-CM  
14  
15  
16 codes 401-405), and dyslipidemia (ICD-9-CM code 272), liver disease (ICD-9-CM codes  
17  
18  
19 070, 571), infertility (ICD-9-CM codes 628), and kidney disease (ICD-9-CM codes 582-  
20  
21  
22 3, 585-6, 588). These comorbidities were selected because they have been shown to be  
23  
24  
25 associated with both GDM and risk of cancers (16-25).

### 26 27 28 ***Statistical analysis***

29  
30  
31 Continuous variables were presented as the mean with SDs. The  $\chi^2$  test was used to  
32  
33  
34 compare categorical variables, and the differences among continuous variables were  
35  
36  
37 compared using the Student's t-test. The proportion of patients with cancer was plotted  
38  
39  
40 by Kaplan–Meier curves with log-rank test constructed to compare the cumulative  
41  
42  
43 incidence of any type of cancer between subjects with and without GDM. The hazard  
44  
45  
46 ratio of cancer was estimated by Cox proportional regression analysis, which was  
47  
48  
49 adjusted for potential confounding variables, such as age and comorbidities. The  
50  
51  
52 predictors satisfied the proportional hazard assumption in Cox model. The statistical  
53  
54  
55 significance was inferred at a two-sided p value of  $<0.05$ . All statistical analyses were  
56  
57  
58  
59  
60

1  
2  
3  
4 performed using the Statistical Analysis Software (SAS) System, V.9.4 (SAS Institute,  
5  
6  
7 Cary, North Carolina, USA). Kaplan-Meier curves were plotted using Stata V.12 (Stata  
8  
9  
10 Corp, College Station, Texas, USA).

## 16 RESULTS

17  
18  
19 Table 1 lists the clinical characteristics of subjects. Overall, 990,572 women were  
20  
21  
22 analyzed. Among them, 47,373 women had GDM. The remaining 943,199 women  
23  
24  
25 without GDM served as the non-exposed group. The average length of follow-up was  
26  
27  
28 6.84±3.05 years, and mean age was 28.97±4.91 years. The incidence of GDM was 4.78%  
29  
30  
31 during the 11-year span. Women with GDM had a higher rate of comorbidities than those  
32  
33  
34 in the non-exposed group, including hypertension, dyslipidemia, liver disease, infertility  
35  
36  
37 and kidney disease (Table 1).

38  
39  
40 Table 2 shows that the adjusted hazard ratio (AHR) of developing any type of cancer  
41  
42  
43 among women with GDM was 1.197 (95% CI, 1.125 to 1.274) compared to women  
44  
45  
46 without GDM after adjusting for age and comorbidities.

47  
48  
49 Patients with GDM were diagnosed with cancer (n=1,063, 2.24%) at a significantly  
50  
51  
52 higher rate than those without GDM (n=18,444, 1.96%; p<0.001) (Table 3). Figure 2  
53  
54  
55 shows the cumulative incidence rates of any type of cancer in patients with or without  
56  
57

1  
2  
3  
4 GDM from the index date until the first occurrence of cancer. The patients with GDM  
5  
6  
7 had higher cancer incidence rates compared with those patients without GDM (log-rank  
8  
9  
10 test:  $p < 0.0001$ ).

11  
12  
13 Adjusting for maternal age at delivery, and comorbidities, women with a history of  
14  
15  
16 GDM had an increased risk of cancers, including cancers of nasopharynx (AHR, 1.739;  
17  
18 95 % CI, 1.400 to 2.161;  $p < 0.0001$ ), kidney (AHR, 2.169; 95 % CI, 1.428 to 3.293,  
19  
20  $p = 0.0003$ ), lung and bronchus (AHR, 1.372; 95 % CI, 1.044 to 1.803;  $p = 0.0231$ ), breast  
21  
22 (AHR, 1.234; 95 % CI, 1.093 to 1.393;  $p = 0.0007$ ), and thyroid gland (AHR, 1.389; 95 %  
23  
24 CI, 1.121 to 1.721;  $p = 0.0026$ ). (Table 3)  
25  
26  
27  
28  
29  
30  
31  
32  
33  
34  
35  
36  
37  
38  
39  
40  
41  
42  
43  
44  
45  
46  
47  
48  
49  
50  
51  
52  
53  
54  
55  
56  
57  
58  
59  
60

## DISCUSSION

The major findings of this study are as follows: [1] GDM is associated with a 19.7% higher risk of developing malignancy. [2] Women with GDM are at a higher risk of developing cancers of nasopharynx, lung and bronchus, kidney, breast, and thyroid glands.

One of our novel findings is that women with GDM are more likely to develop nasopharyngeal cancer (NPC) during the period of follow-up. NPC differs from other head and neck cancers in epidemiology, histology, natural history, and response to treatment. NPC is one of the neoplasms that are linked to infectious agents and displays a distinct racial and geographic distribution. While NPC is rare in Europe and America, it is endemic in Southeastern Asia including Taiwan where Epstein-Barr virus (EBV) infection is prevalent (26). The recrudescence of EBV in immunocompromised patients has been characterized by activating the expression of EBV latency genes, consequently immortalizing the infected cells and leading to carcinogenesis (27). Indeed, the immune dysfunction inherent to T2DM increases the susceptibility to various infections and risk of reactivating latent virus infections as well; eventually contributing to higher rates of mortality (28-31). It is unknown whether GDM, a pre-diabetes condition, is pathogenetically linked to reactivation of EBV infection and subsequent malignant

1  
2  
3  
4 transformation. It is also unknown whether shared environmental risk factors and genetic  
5  
6  
7 susceptibility can be other explanations.  
8  
9

10 Another novel finding in our study is that the risk of developing kidney cancer is  
11  
12 significantly higher in women with GDM, compared to those without GDM. The etiology  
13  
14 of kidney cancer remains elusive, but smoking, hypertension, obesity, analgesics use,  
15  
16 chronic kidney disease (CKD), and genetic defects are potential risk factors (32, 33). Of  
17  
18 these factors, obesity and hypertension also characterize GDM (1). Indeed, it has been  
19  
20 shown that patients with T2DM have a higher risk of developing kidney cancers (34, 35).  
21  
22 In fact, GDM is associated with subsequent development of T2DM and CKD (3, 25). It is  
23  
24 unknown whether prevention of CKD would reduce the risk of kidney cancer in women  
25  
26 with GDM.  
27  
28  
29  
30  
31  
32  
33  
34  
35  
36

37 Our study is also the first to demonstrate the association between GDM and lung  
38  
39 cancers, which is the most common cancer around the world (36). The prevalence of both  
40  
41 lung cancer and GDM has been on the increase in Taiwan and worldwide (4, 37).  
42  
43 Whether this association is causal remains to be determined. Importantly, GDM and lung  
44  
45 cancer do share common risk factors such as smoking, dietary style, and obesity (36, 38).  
46  
47  
48  
49  
50  
51 It is unknown whether modification of these risk factors could impact this association.  
52  
53  
54

55 In the present study, we also observed a clear association between GDM and breast  
56

1  
2  
3  
4 cancer. Previous studies on the association between GDM and breast cancer have  
5  
6  
7 produced mixed results (7-13, 39-44). The reasons for the discrepancy are not clear. They  
8  
9  
10 could be explained by methodological limitations. First, most of these studies were based  
11  
12  
13 on self-reported information about GDM (9-11, 39, 41, 42, 44), which is prone to recall  
14  
15  
16 bias. Secondly, small sample size and relatively rare occurrence of cancer among young  
17  
18  
19 women may result in inadequate statistical power, contributing to inconsistency. In these  
20  
21  
22 regards, our big database from Taiwan NHIRD confers an advantage to overcome these  
23  
24  
25 methodological limitations.

26  
27  
28 In agreement with a previous study (8), we showed that GDM was associated with a  
29  
30  
31 38.9% higher risk of developing thyroid cancer. Interestingly, a large study from United  
32  
33  
34 States found that the risk of thyroid cancer was significantly increased in women, but not  
35  
36  
37 in men, with diabetes (45). Taken together, women with GDM may represent a readily  
38  
39  
40 recognizable subgroup that deserves a more intensive surveillance for thyroid cancer.

41  
42  
43 The elucidation of the relationship between GDM and later cancer risk may not be  
44  
45  
46 straightforward. It is conceivable that GDM may impact subsequent cancer risk through  
47  
48  
49 certain direct or indirect pathophysiological mechanisms such as hyperglycemia,  
50  
51  
52 hyperinsulinemia secondary to insulin resistance and chronic inflammation. Shared risk  
53  
54  
55 factors for GDM and cancers can be other explanations, for example smoking, alcohol



1  
2  
3  
4 drinking, obesity, physical inactivity, hypertension and dietary style.  
5  
6

7       Insulin has mitogenic effects on cells (46). On the other hand, hyperglycemia can  
8  
9  
10 induce production of reactive oxygen species (ROS), which can initiate carcinogenesis by  
11  
12  
13 damaging cellular DNA (47, 48).  
14  
15

16       Recently, the role of systemic inflammation in the pathogenesis of GDM has gained  
17  
18  
19 more and more attention. Increased circulating levels of interleukin-6 (IL-6) and C-  
20  
21  
22 reactive protein (CRP) have been observed in GDM independent of obesity (49, 50),  
23  
24  
25 suggesting GDM as a state of low grade inflammation. Inflammation is also a hallmark of  
26  
27  
28 cancer and is widely recognized to influence all cancer stages from cell transformation to  
29  
30  
31 metastasis (51). Therefore, chronic and systemic inflammation may represent the  
32  
33  
34 biological phenomenon linking GDM to cancer development. Future investigations on  
35  
36  
37 the role of low-grade inflammation in GDM may help identify biomarkers that can better  
38  
39  
40 predict, diagnose and monitor the evolution of GDM. Moreover, specific inflammatory  
41  
42  
43 pathways may represent novel targets for treatment and prevention of long-term adverse  
44  
45  
46 outcomes of GDM, including cancer development.  
47  
48

49       There were several strengths in this study. First, this is population-based study with a  
50  
51  
52 large nationally representative sample from Taiwan NHIRD, thus making selection bias  
53  
54  
55 minimized. Secondly, the use of NHIRD reduced the potential recall bias that is inherent  
56  
57  
58

1  
2  
3  
4 to self-reporting.  
5  
6

7       Limitations of this study included the lack of information about parity, multiple  
8  
9  
10 GDM pregnancy and the histology, subtype and staging of cancer. Secondly, our study  
11  
12  
13 did not have information about potential confounders such as dietary, obesity, physical  
14  
15  
16 activity, smoking, alcohol consumption, environmental exposure, and genetic parameters.  
17  
18  
19 Third, the follow-up period may not be long enough to allow detection of cancers in  
20  
21  
22 young women.  
23  
24  
25  
26  
27

## 28 **CONCLUSIONS**

29  
30  
31       This population-based analysis of Taiwan NHIRD showed that women with GDM in  
32  
33  
34 Taiwan have an increased risk of developing malignancy including cancers of  
35  
36  
37 nasopharynx, lung, kidney, breast, and thyroid gland. Prevention of GDM may be an  
38  
39  
40 important strategy in curbing the development of certain types of cancers in the future.  
41  
42  
43 Our study also highlights under-recognized cancers in women with GDM that warrants  
44  
45  
46 further investigations to develop different surveillance strategies for cancer development  
47  
48  
49 in GDM patients in different ethnic groups.  
50  
51  
52  
53  
54  
55  
56  
57  
58  
59  
60

## Acknowledgements

This work was supported by grants from the Chang Gung Memorial Hospital (Grant CIRPD1D0031). The authors thank Research Services Center For Health Information, Chang Gung University for statistical consultation. This study was based in part on data from NHIRD. The interpretation and conclusions contained herein do not represent those of the National Health Insurance Administration, Department of Health, or National Health Research Institutes.

## Contributors

YSP proposed and designed the study. YSP also drafted the manuscript. MHT supervised the study and critically edited the manuscript; and finally approved the version to be submitted. JRL designed the study's analytic strategy and conducted the data analysis. BHC and CH contribute the study design and prepare the Methods and the Discussion sections of the text, YHL and CHS helped conduct the literature review. All authors read and approved the final manuscript.

## Funding

This work was supported by the Chang-Gung Memorial Hospital, grant number

1  
2  
3  
4 CIRPD1D0031.  
5  
6  
7  
8  
9

### 10 **Competing interests**

11  
12  
13 The authors declare no conflict of interest.  
14  
15

### 16 17 18 19 **Ethics approval**

20  
21  
22 This study protocol was approved by the institutional review board of Chang Gung  
23  
24  
25 Medical Foundation (IRB 103-2572B).  
26  
27  
28  
29  
30

### 31 **Provenance and peer review**

32  
33  
34 Not commissioned; externally peer reviewed.  
35  
36  
37  
38

### 39 **Data sharing statement**

40  
41 No additional data are available.  
42  
43  
44  
45  
46  
47  
48  
49  
50  
51  
52  
53  
54  
55  
56  
57  
58  
59  
60

**REFERENCES**

1. International Association of Diabetes and Pregnancy Study Groups Consensus Panel, Metzger BE, Gabbe SG, Persson B, et al. International association of diabetes and pregnancy study groups recommendations on the diagnosis and classification of hyperglycemia in pregnancy. *Diabetes Care* 2010;33:676.
2. Dornhorst A, Paterson CM, Nicholls JS, et al. High prevalence of gestational diabetes in women from ethnic minority groups. *Diabet Med* 1992;9:820-5.
3. Chodick G, Elchalal U, Sella T, et al. The risk of overt diabetes mellitus among women with gestational diabetes: a population-based study. *Diabet Med* 2010;27:779-85.
4. Ferrara A. Increasing prevalence of gestational diabetes mellitus: a public health perspective. *Diabetes Care* 2007;30(Suppl 2):P141-6.
5. Barone BB, Yeh HC, Snyder CF, et al. Long-term all-cause mortality in cancer patients with preexisting diabetes mellitus: a systematic review and meta- analysis. *JAMA* 2008;300:2754-64.
6. Stattin P, Björ O, Ferrari P, et al. Prospective study of hyperglycemia and cancer risk. *Diabetes Care* 2007;30:561-7.
7. Tong GX, Cheng J, Chai J, et al. Association between gestational diabetes mellitus

- 1  
2  
3  
4 and subsequent risk of cancer: a systematic review of epidemiological studies. *Asian*  
5  
6  
7 *Pac J Cancer Prev* 2014;15:4265-9.  
8  
9
- 10 8. Bejaimal SA, Wu CF, Lowe J, et al. Short-term risk of cancer among women with  
11  
12 previous gestational diabetes: a population-based study. *Diabet Med* 2016;33:39-46.  
13  
14  
15
- 16 9. Powe CE, Tobias DK, Michels KB, et al. History of Gestational Diabetes Mellitus  
17  
18 and Risk of Incident Invasive Breast Cancer among Parous Women in the Nurses'  
19  
20 Health Study II Prospective Cohort. *Cancer Epidemiol Biomarkers Prev*  
21  
22 2017;26:321-7.  
23  
24  
25  
26  
27
- 28 10. Park YM, O'Brien KM, Zhao S, et al. Gestational diabetes mellitus may be associated  
29  
30 with increased risk of breast cancer. *Br J Cancer* 2017;116:960-3.  
31  
32  
33
- 34 11. Dawson SI. Long-term risk of malignant neoplasm associated with gestational  
35  
36 glucose intolerance. *Cancer* 2004;100,149-55.  
37  
38  
39
- 40 12. Sella T, Chodick G, Barchana M, et al. Gestational diabetes and risk of incident  
41  
42 primary cancer: a large historical cohort study in Israel. *Cancer Causes Control*  
43  
44 2011;22,1513-20.  
45  
46  
47  
48
- 49 13. Xie C, Wang W, Li X, Shao N, et al. Gestational diabetes mellitus and maternal  
50  
51 breast cancer risk: a meta-analysis of the literature. *J Matern-Fetal Neonatal Med*  
52  
53 2017;7:1-11.  
54  
55  
56  
57

- 1  
2  
3  
4 14. Chen YC, Yeh, H, Wu JC, et al. Taiwan's National Health Insurance Research  
5  
6  
7 Database: Administrative health care database as study object in bibliometrics.  
8  
9  
10 *Scientometrics* 2011;86:365-80.  
11  
12  
13 15. Hsing AW, Ioannidis JP. Nationwide population science: lessons from the Taiwan  
14  
15  
16 National Health Insurance Research Database. *JAMA Intern Med* 2015;175:1527-9.  
17  
18  
19 16. Kuzu OF, Noory MA, Robertson GP. The Role of Cholesterol in Cancer. *Cancer Res*  
20  
21  
22 2016;76:2063-70.  
23  
24  
25 17. Stocks T, Van Hemelrijck M, Manjer J, et al. Blood pressure and risk  
26  
27  
28 of cancer incidence and mortality in the Metabolic Syndrome and Cancer Project.  
29  
30  
31 *Hypertension* 2012;59:802-10.  
32  
33  
34 18. Yang HP, Cook LS, Weiderpass E, et al. Infertility and incident endometrial cancer  
35  
36  
37 risk: a pooled analysis from the epidemiology of endometrial cancer consortium. *Br J*  
38  
39  
40 *Cancer* 2015;112:925-33.  
41  
42  
43 19. Global Burden of Disease Liver Cancer Collaboration, Akinyemiju T, Abera S, et al.  
44  
45  
46 The Burden of Primary Liver Cancer and Underlying Etiologies From 1990 to 2015  
47  
48  
49 at the Global, Regional, and National Level: Results From the Global Burden of  
50  
51  
52 Disease Study 2015. *JAMA Oncol* 2017;3:1683.  
53  
54  
55 20. Lowrance WT, Ordoñez J, Udaltsova N, et al. CKD and the risk of incident cancer. *J*  
56  
57  
58  
59  
60

- 1  
2  
3  
4 *Am Soc Nephrol* 2014;25:2327-34.  
5  
6  
7 21. Baumfeld Y, Novack L, Wiznitzer A, et al. Pre-Conception Dyslipidemia Is  
8  
9  
10 Associated with Development of Preeclampsia and Gestational Diabetes Mellitus.  
11  
12  
13 *PLoS One* 2015;10:e0139164.  
14  
15  
16 22. Tobias DK, Chavarro JE, Williams MA, et al. History of infertility and risk of  
17  
18  
19 gestational diabetes mellitus: a prospective analysis of 40,773 pregnancies. *Am J*  
20  
21  
22 *Epidemiol* 2013;178:1219-25.  
23  
24  
25 23. Sridhar SB, Xu F, Darbinian J, et al. Pregravid liver enzyme levels and risk of  
26  
27  
28 gestational diabetes mellitus during a subsequent pregnancy. *Diabetes Care*  
29  
30  
31 2014;37:1878-84.  
32  
33  
34 24. Mirghani Dirar A, Doupis J. Gestational diabetes from A to Z. *World J Diabetes*  
35  
36  
37 2017;8:489-511.  
38  
39  
40 25. Dehmer EW, Phadnis MA, Gunderson EP, et al. Association Between Gestational  
41  
42  
43 Diabetes and Incident Maternal CKD: The Coronary Artery Risk Development in  
44  
45  
46 Young Adults (CARDIA) Study. *Am J Kidney Dis* 2018;71:112-22.  
47  
48  
49 26. Yu MC, Yuan JM. Epidemiology of nasopharyngeal carcinoma. *Semin Cancer Biol*  
50  
51  
52 2002;12:421-9.  
53  
54  
55 27. Cohen JI. Epstein-Barr virus infection. *N Engl J Med* 2000;343:481-92.  
56  
57  
58  
59  
60



- 1  
2  
3  
4 28. Plouffe JF, Silva J, Jr, Fekety R, et al. Cell-mediated immunity in diabetes mellitus.  
5  
6  
7 *Infect Immun* 1978;21:425-9.  
8  
9  
10 29. Geerlings SE, Hoepelman AI. Immune dysfunction in patients with diabetes mellitus  
11  
12 (DM) FEMS *Immunol Med Microbiol.* 1999;26:259-65.  
13  
14  
15  
16 30. Berrou J, Fougeray S, Venot M, et al. Natural killer cell function, an important target  
17  
18 for infection and tumor protection, is impaired in type 2 diabetes. *PLoS One*  
19  
20  
21  
22 2013;8:e62418.  
23  
24  
25 31. Kumar M, Roe K, Nerurkar PV, et al. Impaired virus clearance, compromised  
26  
27 immune response and increased mortality in type 2 diabetic mice infected with West  
28  
29 Nile virus. *PLoS One* 2012;7:e44682.  
30  
31  
32  
33  
34 32. Ljungberg B, Campbell SC, Choi HY, et al. The epidemiology of renal cell  
35  
36 carcinoma. *Eur Urol* 2011;60:615-21.  
37  
38  
39  
40 33. Chow WH, Dong LM, Devesa SS. Epidemiology and risk factors for kidney cancer.  
41  
42  
43 *Nat Rev Urol* 2010;7:245-57.  
44  
45  
46 34. Larsson SC, Wolk A. Diabetes mellitus and incidence of kidney cancer: a meta-  
47  
48 analysis of cohort studies. *Diabetologia* 2011;54:1013-8.  
49  
50  
51  
52 35. Tseng CH. Type 2 Diabetes Mellitus and Kidney Cancer Risk: A Retrospective  
53  
54 Cohort Analysis of the National Health Insurance. *PLoS One* 2015;11;10:e0142480.  
55  
56

- 1  
2  
3  
4 36. Dela Cruz CS, Tanoue LT, Matthay RA. Lung cancer: epidemiology, etiology, and  
5  
6 prevention. *Clin Chest Med* 2011;32:605-44.  
7  
8  
9  
10 37. Tseng CH. Diabetes but not insulin increases the risk of lung cancer: a Taiwanese  
11  
12 population-based study. *PLoS One* 2014;9:e101553.  
13  
14  
15  
16 38. Solomon CG, Willett WC, Carey VJ, et al. A prospective study of pregravid  
17  
18 determinants of gestational diabetes mellitus. *JAMA* 1997;278:1078-83.  
19  
20  
21  
22 39. Troisi R, Weiss HA, Hoover RN, et al. Pregnancy characteristics and maternal risk of  
23  
24 breast cancer. *Epidemiology* 1998;9,641-7.  
25  
26  
27  
28 40. Cnattingius S, Torrang A, Ekblom A, et al. Pregnancy characteristics and maternal  
29  
30 risk of breast cancer. *JAMA* 2005;294,2474-80.  
31  
32  
33  
34 41. Brasky TM, Li Y, Jaworowicz DJ Jr, et al. Pregnancy-related characteristics and  
35  
36 breast cancer risk. *Cancer Causes Control* 2013;24,1675-85.  
37  
38  
39  
40 42. Lawlor DA, Smith GD, Ebrahim S. Hyperinsulinaemia and increased risk of breast  
41  
42 cancer: findings from the British Women's Heart and Health Study. *Cancer Causes*  
43  
44 *Control* 2004;15,267-75.  
45  
46  
47  
48  
49 43. Perrin MC, Terry MB, Kleinhaus K, et al. Gestational diabetes and the risk of breast  
50  
51 cancer among women in the Jerusalem Perinatal Study. *Breast Cancer Res Treat*  
52  
53 2008;108,129-35.  
54  
55  
56  
57  
58  
59  
60

- 1  
2  
3  
4 44. Rollison DE, Giuliano AR, Sellers TA, et al. Population-based case-control study of  
5  
6  
7 diabetes and breast cancer risk in Hispanic and non-Hispanic White women living in  
8  
9  
10 US southwestern states. *Am J Epidemiol* 2008;167,447-56.  
11  
12  
13 45. Aschebrook-Kilfoy B, Sabra MM, Brenner A, et al. Diabetes and thyroid cancer risk  
14  
15  
16 in the National Institutes of Health-AARP Diet and Health Study. *Thyroid*  
17  
18  
19 2011;21:957-63.  
20  
21  
22 46. Vigneri P, Frasca F, Siacca L, et al. Diabetes and cancer. *Endocr. Relat. Cancer*  
23  
24  
25 2009;16,1103-23.  
26  
27  
28 47. Chandrasekaran K, Swaminathan K, Chatterjee S, et al. Apoptosis in hepG2 cells  
29  
30  
31 exposed to high glucose. *Toxicol. In Vitro* 2010;24,387-96.  
32  
33  
34 48. Zhang Y, Zhou J, Wang T, Cai T. High level glucose increases mutagenesis in human  
35  
36  
37 lymphoblastoid cells. *Int. J. Biol. Sci.* 2007;3,275-9.  
38  
39  
40 49. Ategbo JM, Grissa O, Yessoufou A, et al. Modulation of adipokines and cytokines in  
41  
42  
43 gestational diabetes and macrosomia. *J Clin Endocrinol Metab* 2006;91:4137e43.  
44  
45  
46 50. Wolf M, Sandler L, Hsu K, et al. First-trimester C-reactive protein and subsequent  
47  
48  
49 gestational diabetes. *Diabetes Care* 2003;26:819-24.  
50  
51  
52 51. Leonardi GC, Accardi G, Monastero R, et al. Ageing: from inflammation to cancer.  
53  
54  
55 *Immun Ageing* 2018;15:1.  
56

1  
2  
3  
4  
5  
6  
7  
8  
9  
10  
11  
12  
13  
14  
15  
16  
17  
18  
19  
20  
21  
22  
23  
24  
25  
26  
27  
28  
29  
30  
31  
32  
33  
34  
35  
36  
37  
38  
39  
40  
41  
42  
43  
44  
45  
46  
47  
48  
49  
50  
51  
52  
53  
54  
55  
56  
57  
58  
59  
60

For peer review only

Table 1 Baseline characteristics

|                                          | Pregnancy women<br>with GDM |         | Pregnancy women<br>without GDM |         | P value |
|------------------------------------------|-----------------------------|---------|--------------------------------|---------|---------|
| Number of population, n (%)              | 47373                       | (4.78)  | 943199                         | (95.22) |         |
| Age, y, mean±SD                          | 31.61±4.54                  |         | 28.83±4.89                     |         | <.0001  |
| Age group, n (%)                         |                             |         |                                |         | <.0001  |
| ≤ 20                                     | 407                         | (0.86)  | 45942                          | (4.87)  |         |
| 21-30                                    | 18617                       | (39.30) | 558108                         | (59.17) |         |
| 31-40                                    | 27203                       | (57.42) | 329929                         | (34.98) |         |
| 41-50                                    | 1146                        | (2.42)  | 9220                           | (0.98)  |         |
| Comorbidity, n (%)                       |                             |         |                                |         |         |
| Hypertension (ICD-9: 401-405)            | 1479                        | (3.12)  | 7743                           | (0.82)  | <.0001  |
| Dyslipidemia (ICD-9: 272)                | 1132                        | (2.39)  | 8197                           | (0.87)  | <.0001  |
| Liver disease (ICD-9: 070, 571)          | 3165                        | (6.68)  | 44509                          | (4.72)  | <.0001  |
| Infertility, female (ICD-9: 628)         | 8001                        | (16.89) | 94405                          | (10.01) | <.0001  |
| Kidney disease (ICD-9:582-3, 585-6, 588) | 51                          | (0.11)  | 626                            | (0.07)  | 0.0008  |

GDM= Gestational diabetes; SD=Standard Deviation; ICD-9= International Classification of Disease, 9th

Revision

Table 2 Hazard ratio (HR) of developing cancer in relation to baseline characteristics of study participants:

|                                           | Crude HR<br>(95% CI) | P value | Adjusted HR<br>(95% CI) | P value |
|-------------------------------------------|----------------------|---------|-------------------------|---------|
| <b>Patients</b>                           |                      |         |                         |         |
| GDM                                       | 1.421 (1.336-1.512)  | <0.0001 | 1.197 (1.125-1.274)     | 0.0012  |
| Non-GDM                                   | 1.0 (ref)            |         | 1.0 (ref)               |         |
| <b>Age</b>                                |                      |         |                         |         |
| ≤ 20                                      | 1.0 (ref)            |         | 1.0 (ref)               |         |
| 21-30                                     | 1.627 (1.488-1.779)  | <0.0001 | 1.581 (1.446-1.729)     | <0.0001 |
| 31-40                                     | 2.843 (2.600-3.109)  | <0.0001 | 2.678 (2.448-2.930)     | <0.0001 |
| 41-50                                     | 4.883 (4.291-5.556)  | <0.0001 | 4.479 (3.933-5.100)     | <0.0001 |
| <b>Comorbidity, n (%)</b>                 |                      |         |                         |         |
| Hypertension (ICD-9: 401-405)             | 1.471 (1.291-1.677)  | <0.0001 | 1.114 (0.976-1.272)     | 0.1101  |
| Dyslipidemia (ICD-9: 272)                 | 1.866 (1.648-2.113)  | <0.0001 | 1.395 (1.229-1.583)     | <0.0001 |
| Liver disease (ICD-9: 070, 571)           | 1.573 (1.486-1.665)  | <0.0001 | 1.432 (1.351-1.517)     | <0.0001 |
| Infertility, female (ICD-9: 628)          | 1.397 (1.340-1.457)  | <0.0001 | 1.185 (1.136-1.236)     | <0.0001 |
| Kidney disease (ICD-9: 582-3, 585-6, 588) | 2.077 (1.403-3.073)  | 0.0003  | 1.623 (1.095-2.404)     | 0.0159  |

HR=Hazard Ratio; GDM= Gestational diabetes; ICD-9= International Classification of Disease, 9th

Revision

Table 3 Hazard ratio (HR) of the first cancer diagnosis between GDM group and non GDM group

| (ICD-9 code)                              | Women<br>with GDM<br>(N=47373) | Women<br>without GDM<br>(N=943199) | Crude HR<br>(95% CI) | P value | Adjusted HR<br>(95% CI) | P value |
|-------------------------------------------|--------------------------------|------------------------------------|----------------------|---------|-------------------------|---------|
| <b>Head and neck</b>                      |                                |                                    |                      |         |                         |         |
| Oral & pharynx (140-1,143-6,148-9)        | 19 (0.04)                      | 389 (0.04)                         | 1.230 (0.776-1.950)  | 0.3792  | 1.105 (0.695-1.759)     | 0.6724  |
| Nasopharynx (147)                         | 90 (0.19)                      | 1151 (0.12)                        | 1.897 (1.530-2.351)  | <.0001  | 1.739 (1.400-2.161)     | <.0001  |
| <b>Digestive system</b>                   |                                |                                    |                      |         |                         |         |
| Stomach (151)                             | 18 (0.04)                      | 256 (0.03)                         | 1.703 (1.056-2.749)  | 0.0291  | 1.322 (0.816-2.142)     | 0.2570  |
| Colorectum (153-4)                        | 100 (0.21)                     | 1705 (0.18)                        | 1.420 (1.160-1.738)  | 0.0007  | 1.180 (0.963-1.447)     | 0.1099  |
| Liver (155)                               | 87 (0.18)                      | 1393 (0.15)                        | 1.504 (1.211-1.868)  | 0.0002  | 1.242 (0.998-1.545)     | 0.0521  |
| Pancreas (157)                            | 17 (0.04)                      | 314 (0.03)                         | 1.316 (0.808-2.145)  | 0.2699  | 1.072(0.655-1.755)      | 0.7807  |
| <b>Genital system</b>                     |                                |                                    |                      |         |                         |         |
| Cervix uteri (180)                        | 37 (0.08)                      | 962 (0.10)                         | 0.925 (0.666-1.285)  | 0.6429  | 0.903 (0.649-1.256)     | 0.5438  |
| Uterus (179,182)                          | 42 (0.09)                      | 803 (0.09)                         | 1.323 (0.970-1.805)  | 0.0768  | 1.051 (0.769-1.437)     | 0.7534  |
| Ovary (183)                               | 50 (0.11)                      | 1146 (0.12)                        | 1.061 (0.800-1.409)  | 0.6797  | 0.963 (0.724-1.280)     | 0.7928  |
| <b>Urinary system</b>                     |                                |                                    |                      |         |                         |         |
| Urinary bladder (188)                     | 9 (0.02)                       | 162 (0.02)                         | 1.387 (0.709-2.715)  | 0.3395  | 1.034 (0.525-2.033)     | 0.9236  |
| Kidney (189)                              | 25 (0.05)                      | 245 (0.03)                         | 2.573 (1.704-3.885)  | <.0001  | 2.169 (1.428-3.293)     | 0.0003  |
| <b>Hematological system</b>               |                                |                                    |                      |         |                         |         |
| Leukemia (204-8)                          | 11 (0.02)                      | 359 (0.04)                         | 0.742 (0.407-1.352)  | 0.3293  | 0.735 (0.402-1.344)     | 0.3169  |
| Lymphoma (200-3)                          | 19 (0.04)                      | 596 (0.06)                         | 0.771 (0.488-1.217)  | 0.2641  | 0.774 (0.489-1.226)     | 0.2754  |
| <b>Bone and connective tissue (170-1)</b> |                                |                                    |                      |         |                         |         |
| <b>Lung and bronchus (162)</b>            | 56 (0.12)                      | 846 (0.09)                         | 1.666 (1.271-2.184)  | 0.0002  | 1.372 (1.044-1.803)     | 0.0231  |
| <b>Skin (173)</b>                         | 15 (0.03)                      | 201 (0.02)                         | 1.834 (1.085-3.101)  | 0.0236  | 1.664 (0.980-2.825)     | 0.0594  |
| <b>Breast (174)</b>                       | 284 (0.60)                     | 4373 (0.46)                        | 1.654 (1.467-1.866)  | <.0001  | 1.234 (1.093-1.393)     | 0.0007  |
| <b>Brain (191)</b>                        | 19 (0.04)                      | 331 (0.04)                         | 1.382 (0.870-2.195)  | 0.1703  | 1.232 (0.772-1.968)     | 0.3818  |
| <b>Thyroid (193)</b>                      | 91 (0.19)                      | 1423 (0.15)                        | 1.582 (1.279-1.956)  | <.0001  | 1.389 (1.121-1.721)     | 0.0026  |
| <b>Other sites</b>                        | 91 (0.16)                      | 1719 (0.18)                        | 1.251 (0.989-1.583)  | 0.0619  | 1.154 (0.910-1.462)     | 0.2373  |
| <b>Total (140-208)</b>                    | 1063 (2.24)                    | 18444 (1.96)                       | 1.421 (1.336-1.512)  | <.0001  | 1.197 (1.125-1.274)     | <.0001  |

Model was adjusted for age, hypertension, dyslipidemia, liver disease, infertility, and kidney disease; HR=Hazard Ratio; GDM= Gestational diabetes; ICD-9= International Classification of Disease, 9th Revision

1  
2  
3  
4  
5  
6  
7  
8  
9  
10  
11  
12  
13  
14  
15  
16  
17  
18  
19  
20  
21  
22  
23  
24  
25  
26  
27  
28  
29  
30  
31  
32  
33  
34  
35  
36  
37  
38  
39  
40  
41  
42  
43  
44  
45  
46  
47  
48  
49  
50  
51  
52  
53  
54  
55  
56  
57  
58  
59  
60

For peer review only



1  
2  
3 **LEGENDS:**  
4

5 Figure 1: Flow chart for population selection  
6  
7

8 Figure 2: The cumulative incidence rates of any type of cancer in patients with or without  
9  
10  
11  
12 GDM from the index date until the first occurrence of the cancer using Kaplan-Meier  
13  
14  
15 methods.  
16  
17  
18  
19  
20  
21  
22  
23  
24  
25  
26  
27  
28  
29  
30  
31  
32  
33  
34  
35  
36  
37  
38  
39  
40  
41  
42  
43  
44  
45  
46  
47  
48  
49  
50  
51  
52  
53  
54  
55  
56  
57  
58  
59  
60

For peer review only

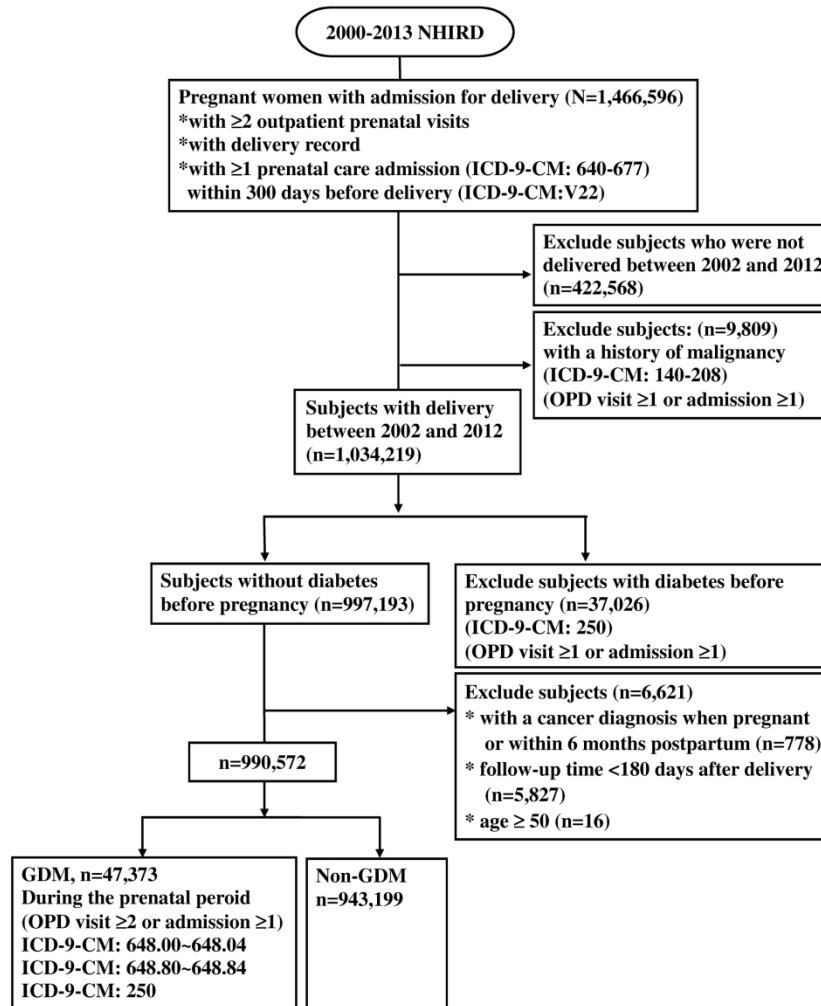

Figure 1

209x297mm (300 x 300 DPI)

1  
2  
3  
4  
5  
6  
7  
8  
9  
10  
11  
12  
13  
14  
15  
16  
17  
18  
19  
20  
21  
22  
23  
24  
25  
26  
27  
28  
29  
30  
31  
32  
33  
34  
35  
36  
37  
38  
39  
40  
41  
42  
43  
44  
45  
46  
47  
48  
49  
50  
51  
52  
53  
54  
55  
56  
57  
58  
59  
60

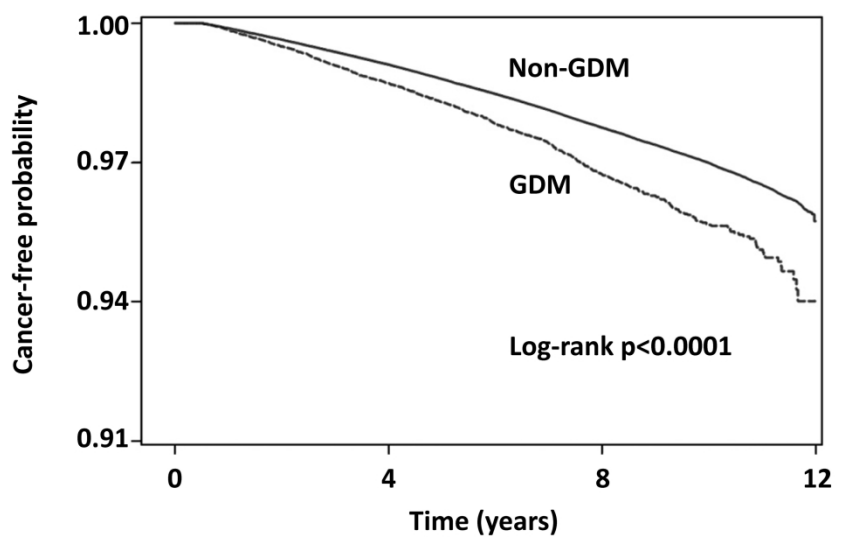

Figure 2

297x209mm (300 x 300 DPI)

**STROBE 2007 (v4) Statement—Checklist of items that should be included in reports of *cohort studies***

| Section/Topic                | Item # | Recommendation                                                                                                                                                                       | Reported on page # |
|------------------------------|--------|--------------------------------------------------------------------------------------------------------------------------------------------------------------------------------------|--------------------|
| Title and abstract           | 1      | (a) Indicate the study's design with a commonly used term in the title or the abstract                                                                                               | 1,4                |
|                              |        | (b) Provide in the abstract an informative and balanced summary of what was done and what was found                                                                                  | 4-5                |
| <b>Introduction</b>          |        |                                                                                                                                                                                      |                    |
| Background/rationale         | 2      | Explain the scientific background and rationale for the investigation being reported                                                                                                 | 7-8                |
| Objectives                   | 3      | State specific objectives, including any prespecified hypotheses                                                                                                                     | 8                  |
| <b>Methods</b>               |        |                                                                                                                                                                                      |                    |
| Study design                 | 4      | Present key elements of study design early in the paper                                                                                                                              | 9-10               |
| Setting                      | 5      | Describe the setting, locations, and relevant dates, including periods of recruitment, exposure, follow-up, and data collection                                                      | 9-11               |
| Participants                 | 6      | (a) Give the eligibility criteria, and the sources and methods of selection of participants. Describe methods of follow-up                                                           | 10-11              |
|                              |        | (b) For matched studies, give matching criteria and number of exposed and unexposed                                                                                                  | N/A                |
| Variables                    | 7      | Clearly define all outcomes, exposures, predictors, potential confounders, and effect modifiers. Give diagnostic criteria, if applicable                                             | 11-12              |
| Data sources/<br>measurement | 8*     | For each variable of interest, give sources of data and details of methods of assessment (measurement). Describe comparability of assessment methods if there is more than one group | 10-12              |
| Bias                         | 9      | Describe any efforts to address potential sources of bias                                                                                                                            | 10-12              |
| Study size                   | 10     | Explain how the study size was arrived at                                                                                                                                            | 10                 |
| Quantitative variables       | 11     | Explain how quantitative variables were handled in the analyses. If applicable, describe which groupings were chosen and why                                                         | 12                 |
| Statistical methods          | 12     | (a) Describe all statistical methods, including those used to control for confounding                                                                                                | 11-12              |
|                              |        | (b) Describe any methods used to examine subgroups and interactions                                                                                                                  | 12                 |
|                              |        | (c) Explain how missing data were addressed                                                                                                                                          | 10                 |
|                              |        | (d) If applicable, explain how loss to follow-up was addressed                                                                                                                       | N/A                |
|                              |        | (e) Describe any sensitivity analyses                                                                                                                                                | N/A                |
| <b>Results</b>               |        |                                                                                                                                                                                      |                    |

|                          |     |                                                                                                                                                                                                              |               |
|--------------------------|-----|--------------------------------------------------------------------------------------------------------------------------------------------------------------------------------------------------------------|---------------|
| Participants             | 13* | (a) Report numbers of individuals at each stage of study—eg numbers potentially eligible, examined for eligibility, confirmed eligible, included in the study, completing follow-up, and analysed            | 13            |
|                          |     | (b) Give reasons for non-participation at each stage                                                                                                                                                         | N/A           |
|                          |     | (c) Consider use of a flow diagram                                                                                                                                                                           | 10, See Fig 1 |
| Descriptive data         | 14* | (a) Give characteristics of study participants (eg demographic, clinical, social) and information on exposures and potential confounders                                                                     | 13,28-29      |
|                          |     | (b) Indicate number of participants with missing data for each variable of interest                                                                                                                          | 13            |
|                          |     | (c) Summarise follow-up time (eg, average and total amount)                                                                                                                                                  | 13            |
| Outcome data             | 15* | Report numbers of outcome events or summary measures over time                                                                                                                                               | 13-14         |
| Main results             | 16  | (a) Give unadjusted estimates and, if applicable, confounder-adjusted estimates and their precision (eg, 95% confidence interval). Make clear which confounders were adjusted for and why they were included | 13-14, 28-30  |
|                          |     | (b) Report category boundaries when continuous variables were categorized                                                                                                                                    | 13, 28        |
|                          |     | (c) If relevant, consider translating estimates of relative risk into absolute risk for a meaningful time period                                                                                             | 13-14, 29-30  |
| Other analyses           | 17  | Report other analyses done—eg analyses of subgroups and interactions, and sensitivity analyses                                                                                                               | 13, See Fig 2 |
| <b>Discussion</b>        |     |                                                                                                                                                                                                              |               |
| Key results              | 18  | Summarise key results with reference to study objectives                                                                                                                                                     | 15            |
| <b>Limitations</b>       |     |                                                                                                                                                                                                              |               |
| Interpretation           | 20  | Give a cautious overall interpretation of results considering objectives, limitations, multiplicity of analyses, results from similar studies, and other relevant evidence                                   | 19            |
| Generalisability         | 21  | Discuss the generalisability (external validity) of the study results                                                                                                                                        | 19            |
| <b>Other information</b> |     |                                                                                                                                                                                                              |               |
| Funding                  | 22  | Give the source of funding and the role of the funders for the present study and, if applicable, for the original study on which the present article is based                                                | 20            |

\*Give information separately for cases and controls in case-control studies and, if applicable, for exposed and unexposed groups in cohort and cross-sectional studies.

**Note:** An Explanation and Elaboration article discusses each checklist item and gives methodological background and published examples of transparent reporting. The STROBE checklist is best used in conjunction with this article (freely available on the Web sites of PLoS Medicine at <http://www.plosmedicine.org/>, Annals of Internal Medicine at <http://www.annals.org/>, and Epidemiology at <http://www.epidem.com/>). Information on the STROBE Initiative is available at [www.strobe-statement.org](http://www.strobe-statement.org).
